# Supplementary material for: A hybrid sub-lineage of Listeria monocytogenes comprising hypervirulent isolates
Source: PubMed Central journal article supplement (PMC6768887; doi:10.1038/s41467-019-12072-1), 2019-09-30
Supplement: 41467_2019_12072_MOESM1_ESM.pdf [file 41467_2019_12072_MOESM1_ESM.pdf]

**A hybrid sub-lineage of *Listeria monocytogenes* comprising hypervirulent isolates**

**Yin et al.**

## Supplementary Material

Supplementary Figure 1 : Comparative virulence of XYSN, 16E, 15LG, EGD-e, NTSN, LM11-00412, LM13-00344, LM6-01023 and *L. ivanovii* ZJU. (A, B) Mouse body weight change on day 3 and day 5 after infection; (C, D, E, F) Bacteria load in the organs at 5 days post-infection. Female C57BL/6 mice were orally inoculated, the dose of Lm:  $2 \times 10^6$  CFU for XYSN and 16E;  $1 \times 10^6$  CFU for 15LG (1 mice was dead during infection);  $2 \times 10^8$  CFU for EGD-e, NTSN, LM11-00412, LM13-00344, LM6-01023 and *L. ivanovii* ZJU ( $n = 7$ ). Each dot represents an organ from one infected mouse.

A

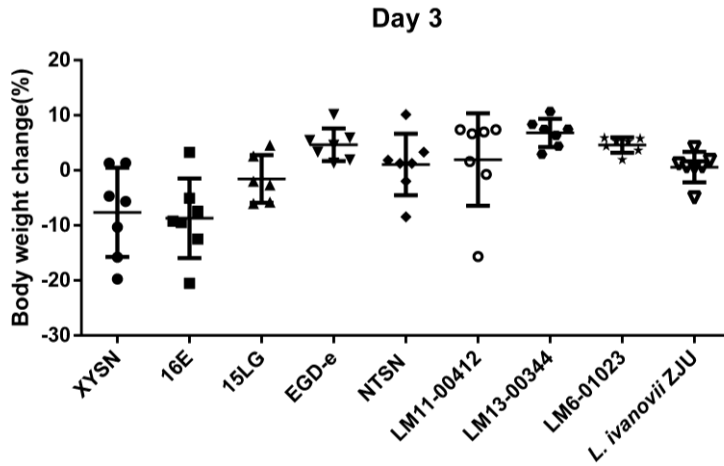

B

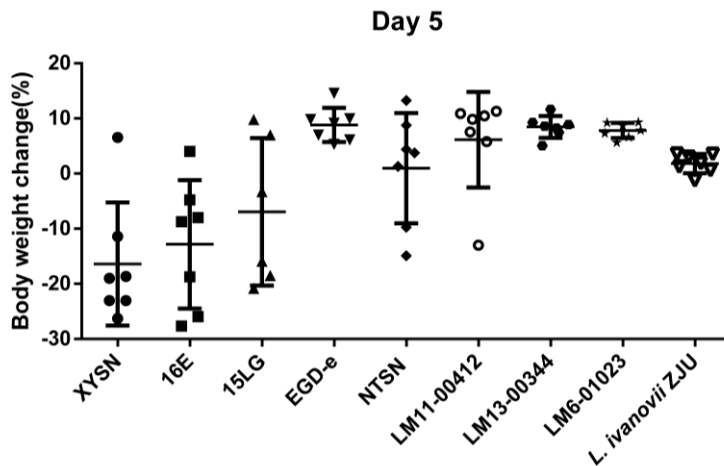

C

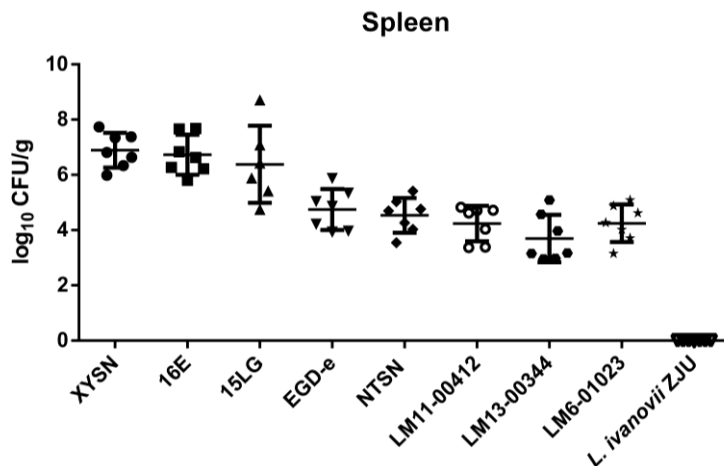

D

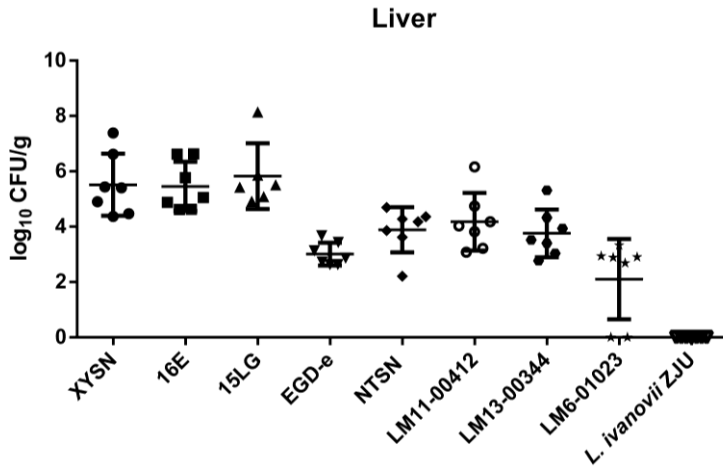

E

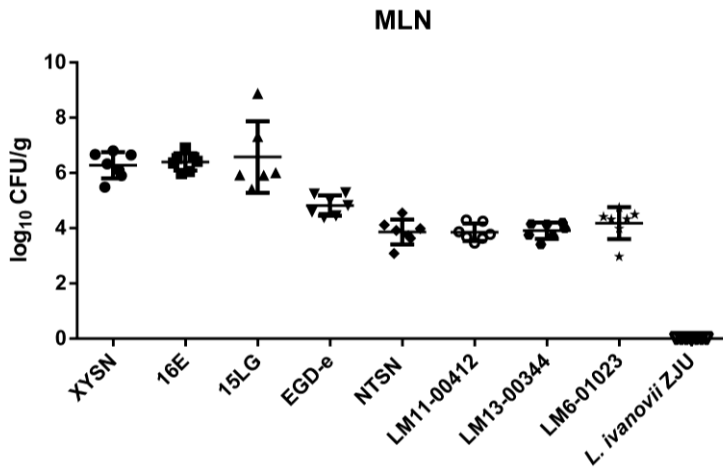

F

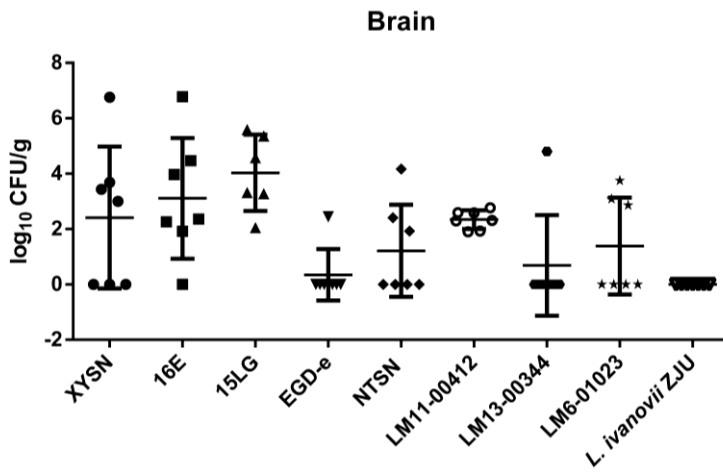

**Supplementary Figure 2: Chromosomal region *L. monocytogenes* XYSN showing partial LIPI-II and its comparison to corresponding region in *L. ivanovii* WSLC3009.** Three of the twelve genes (*smcL*, *i-inlF*, *i-inlE*) of LIPI-II locus defined in *L. ivanovii* were present in HSL- II isolates. The tRNA-Arg was located upstream while IS256 and IS3 family transposases were located downstream to this partial LIPI-II. The acetyltransferase gene present adjacent to both these transposases on the XYSN chromosome shows highest sequence similarity to *L. ivanovii*. The *L. ivanovii* WSLC3009 region was adapted from Dominguez-Bernal et al., 2006.

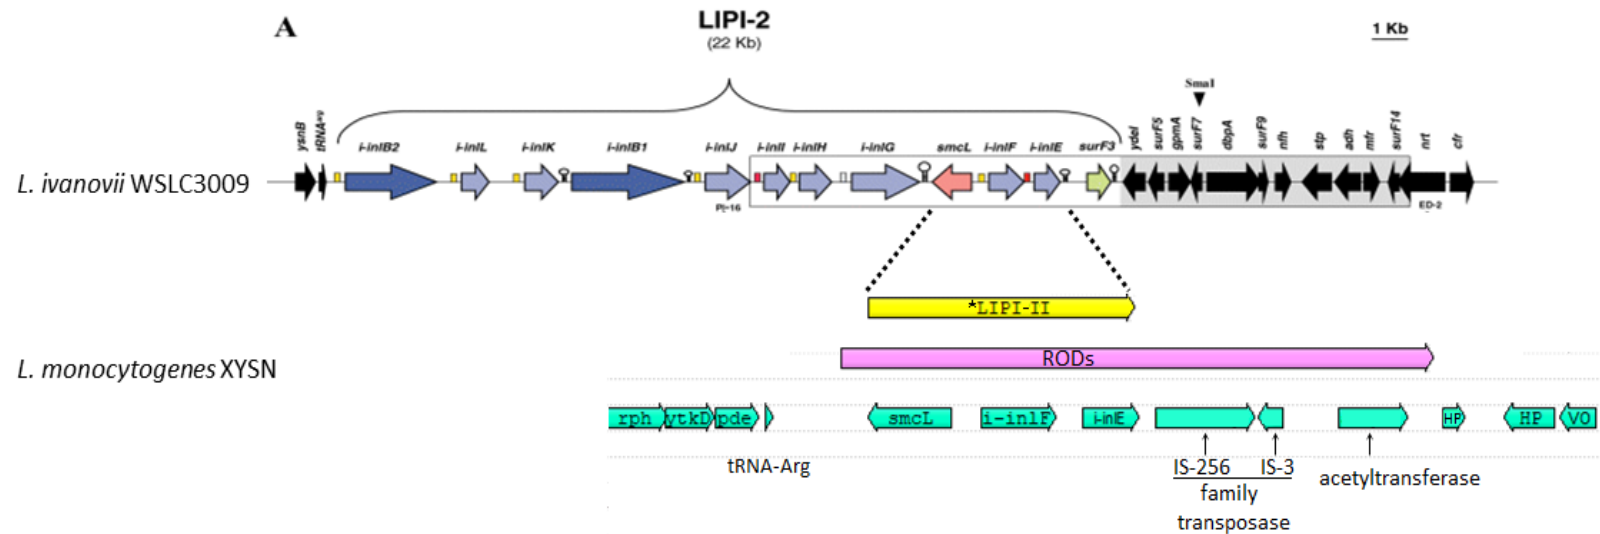

**Supplementary Figure 3: Screening and identification of mutants from the transposon mutagenesis library using Caco-2 BBe infection model.** (A) The invasion rate of 1127 mutants using Caco-2 BBe. A 20-fold reduction of invasion capability was observed in three of the transposon mutants. LMxysn\_0462 was encoding InlA, while LMxysn\_1095 and LMxysn\_1098 were involved in glycosylation of wall teichoic acid (WTAs); (B) Invasion ability of mutants 1095 :: Tn, 1098 :: Tn and 0462 :: Tn for Caco-2 BBe cells at a MOI of 20 for 1 h. Error bars represent SD,  $n = 3$  independent experiments. Statistical analyses were carried out by Dunnett's multiple comparisons test: \*\*\*\* $P < 0.0001$  ; (C) Multiplane confocal images of the invasive ability of XYSN and the respective transposon mutants (green) at 2 hours post entry.

**A**

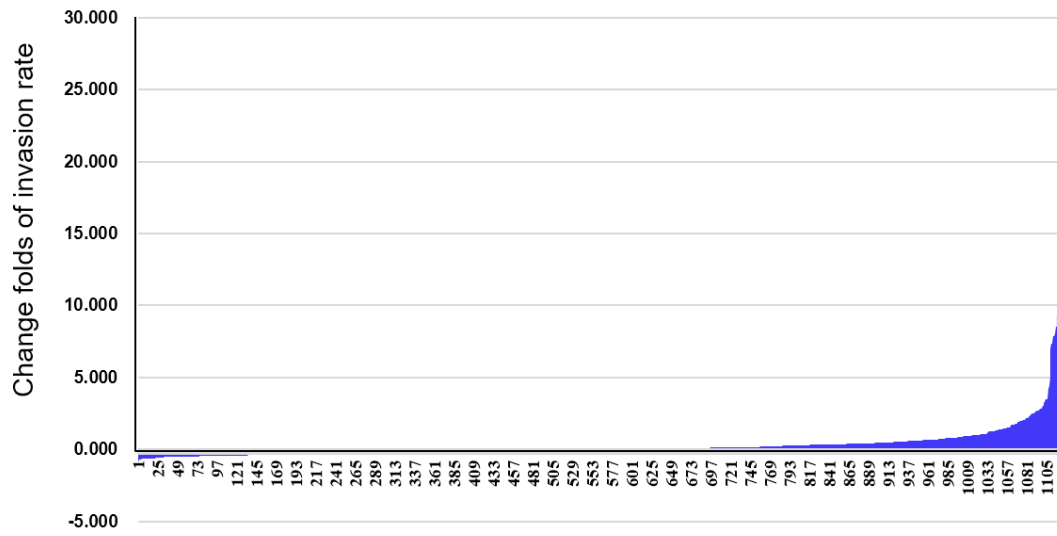

**B**

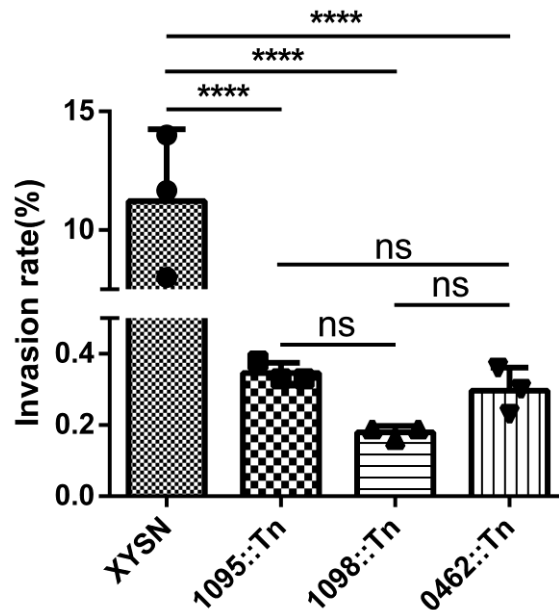

C

**XYSN**

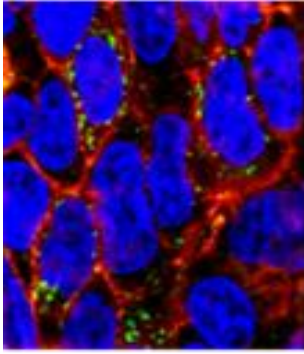

**1095::Tn**

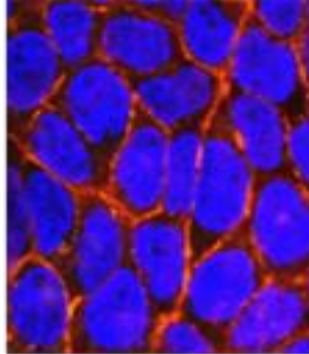

**1098::Tn**

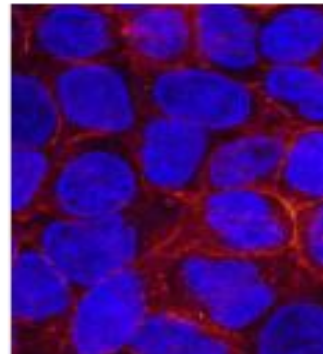

**Supplementary Figure 4 : Confocal images of the adhesion capabilities of XYSN,  $\Delta 1095$ ,  $\Delta 1095::1095$  in Caco-2 BBe cells.** The bacteria were GFP- labelled (green), the actin cytoskeleton was stained by phalloidin (red), and DNA was stained by DAPI (blue) following fixation and permeabilization of the sample. Magnification of all images:  $\times 1000$ . Scale bars, 10  $\mu\text{m}$ . Different colours in the shaded pictures were obtained using depth coding and represent the depth of subcellular structure of both bacteria and Caco-2 BBe from the surface of the slide. The experiment was repeated three times.

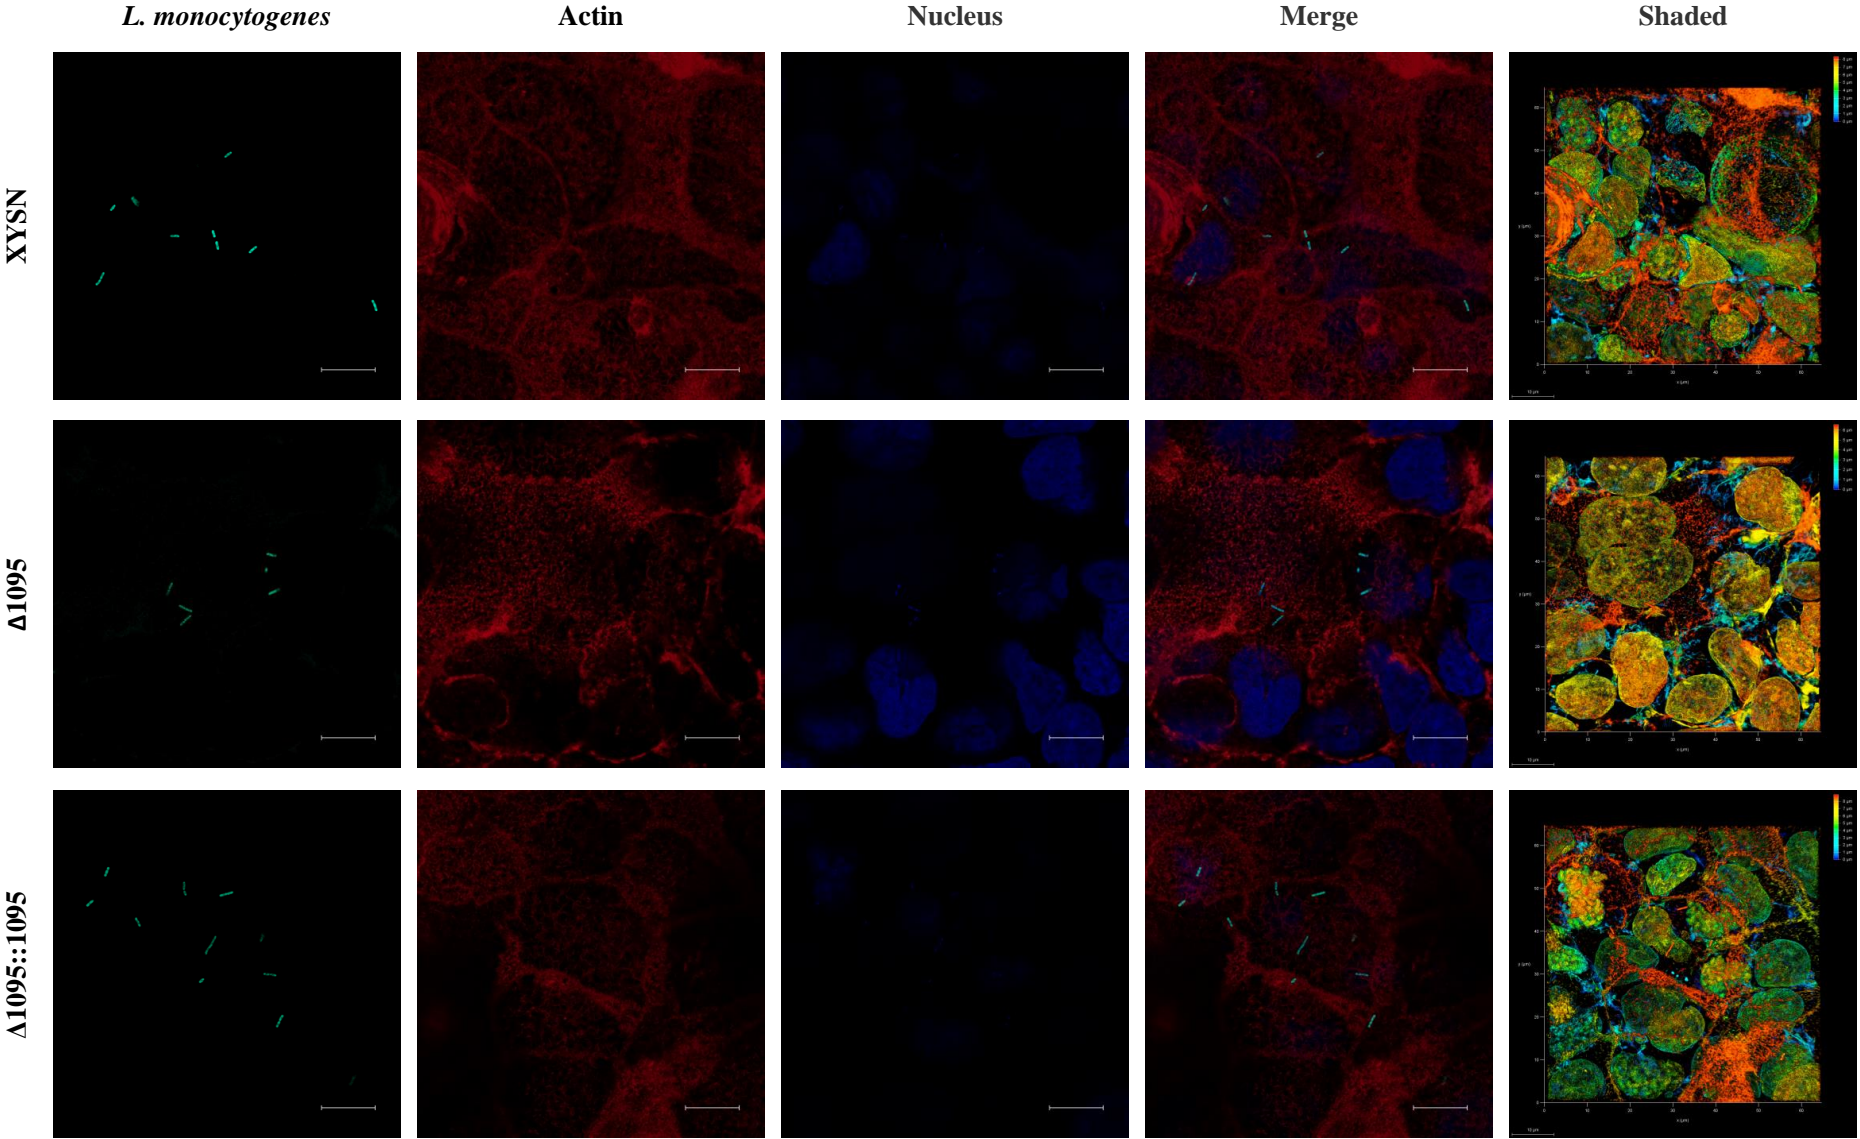

**Supplementary Figure 5: LMxysn\_1095 is required for agglutination with serogroup 4 anti-serum.** Images of agglutination patterns obtained with XYSN, its isogenic  $\Delta 1095$  mutant and the complemented strain  $\Delta 1095::1095$ .

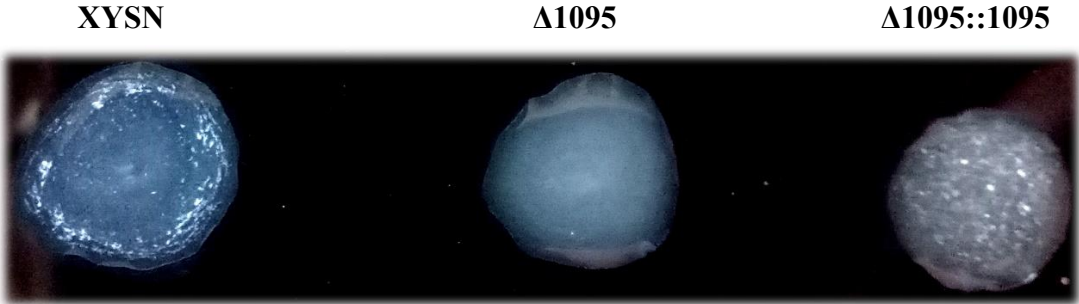



**Supplementary Figure 6: Hemolytic activities of the NTSN (Lineage I), EGD-e (Lineage II) and XYSN (Hybrid Sublineage II).** Culture supernatants were serially diluted in two-fold steps, added to 1% sheep blood cells and incubated at 37°C for 1 h. Microtiter wells were observed following centrifugation to pellet erythrocytes. Hemolytic activities can be directly read by visual inspection.

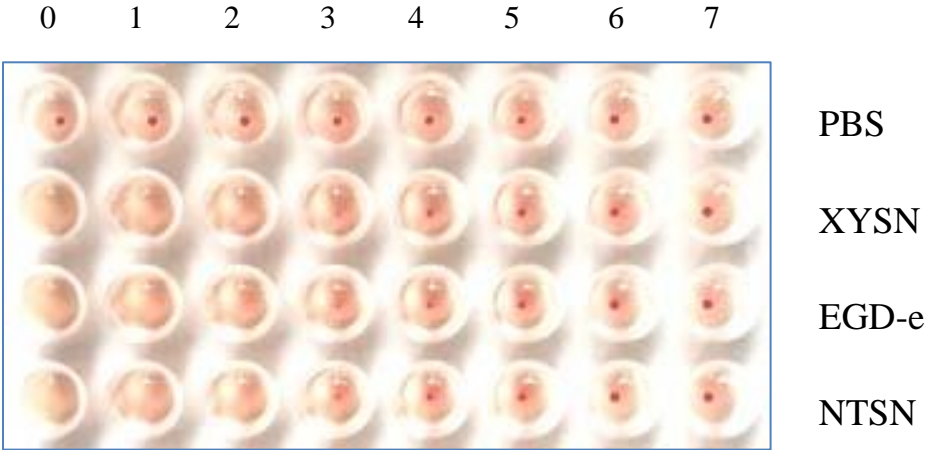

**Supplementary Figure 7: *In silico* comparison of the rhamnose-operon region in lineage I-IV, lineage V (XYSN) and *L. seeligeri* SLCC 3954.** The rhamnose-encoding operon (lmo2846-lmo2851) was absent in lineage IV and HSL-II. Comparative analysis of the same region in rhamnose-negative *L. seeligeri* genome reveals its similarity to XYSN.

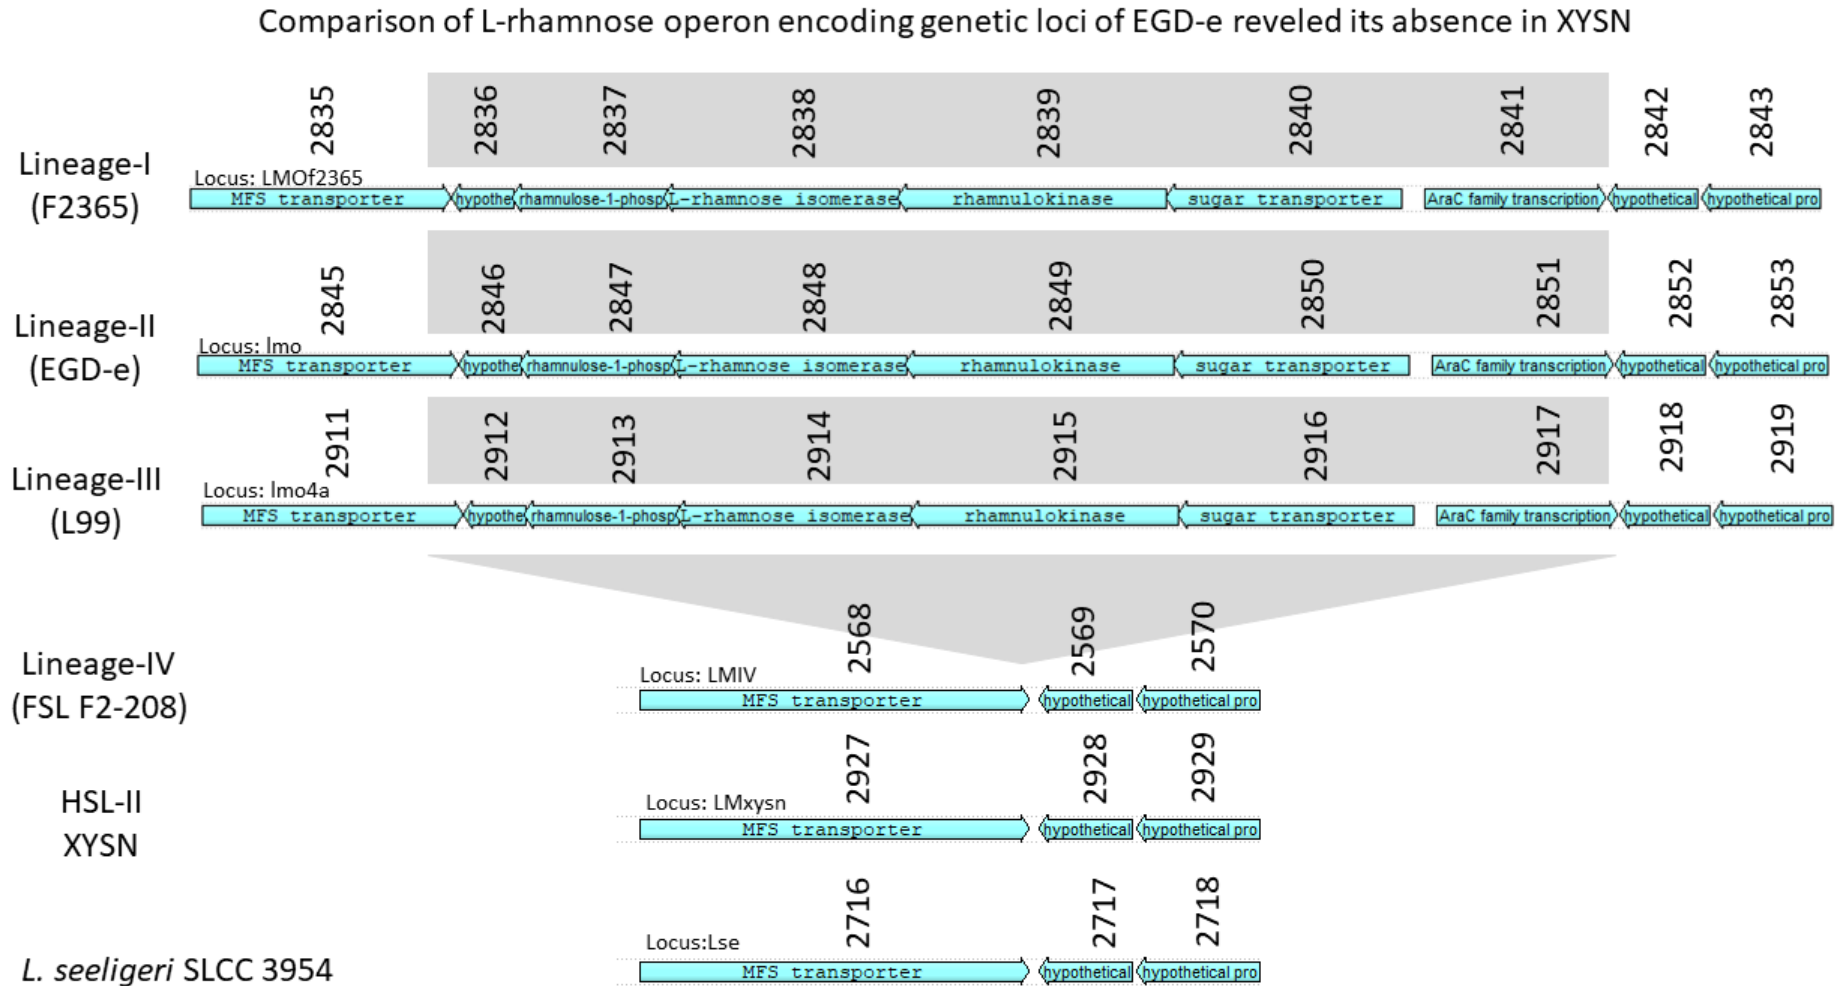



**Supplementary Figure 9: Wall teichoic acid (WTA)-associated genetic cluster of XYSN and other serotypes of *Listeria*.** The genetic loci and structure of WTA (as described by Shen et al., 2017)<sup>2</sup> are compared to highlight major differences. WTA-associated loci are depicted with orange arrows while black arrows indicate commonly occurring upstream and downstream genes. The vertical gray to black shade depicts the respective amino acid sequence homology (90-100%) (90% coverage and 90% identity). Comparative analysis revealed the genetic loci of XYSN to be closely related to that of 4b, 4e, 4d and 4f. The UPLC-MS based study of WTA supports this observation and show that the WTA of XYSN is structurally related to 4b expect that its *N*-acetylglucosamine is decorated only with galactose. The AA-sequences of WTA gene clusters of different serotype strains were compared using Easyfig<sup>4</sup>. Serotype 4f and 4g initially allocated to *L. monocytogenes* (Seeliger and Hohne, 1979)<sup>3</sup> but latter these strains were revealed to be of *L. innocua*. Therefore, to distinguish the serotype of lineage HSL- II isolates, a novel designation viz. ‘4h’ was allocated.

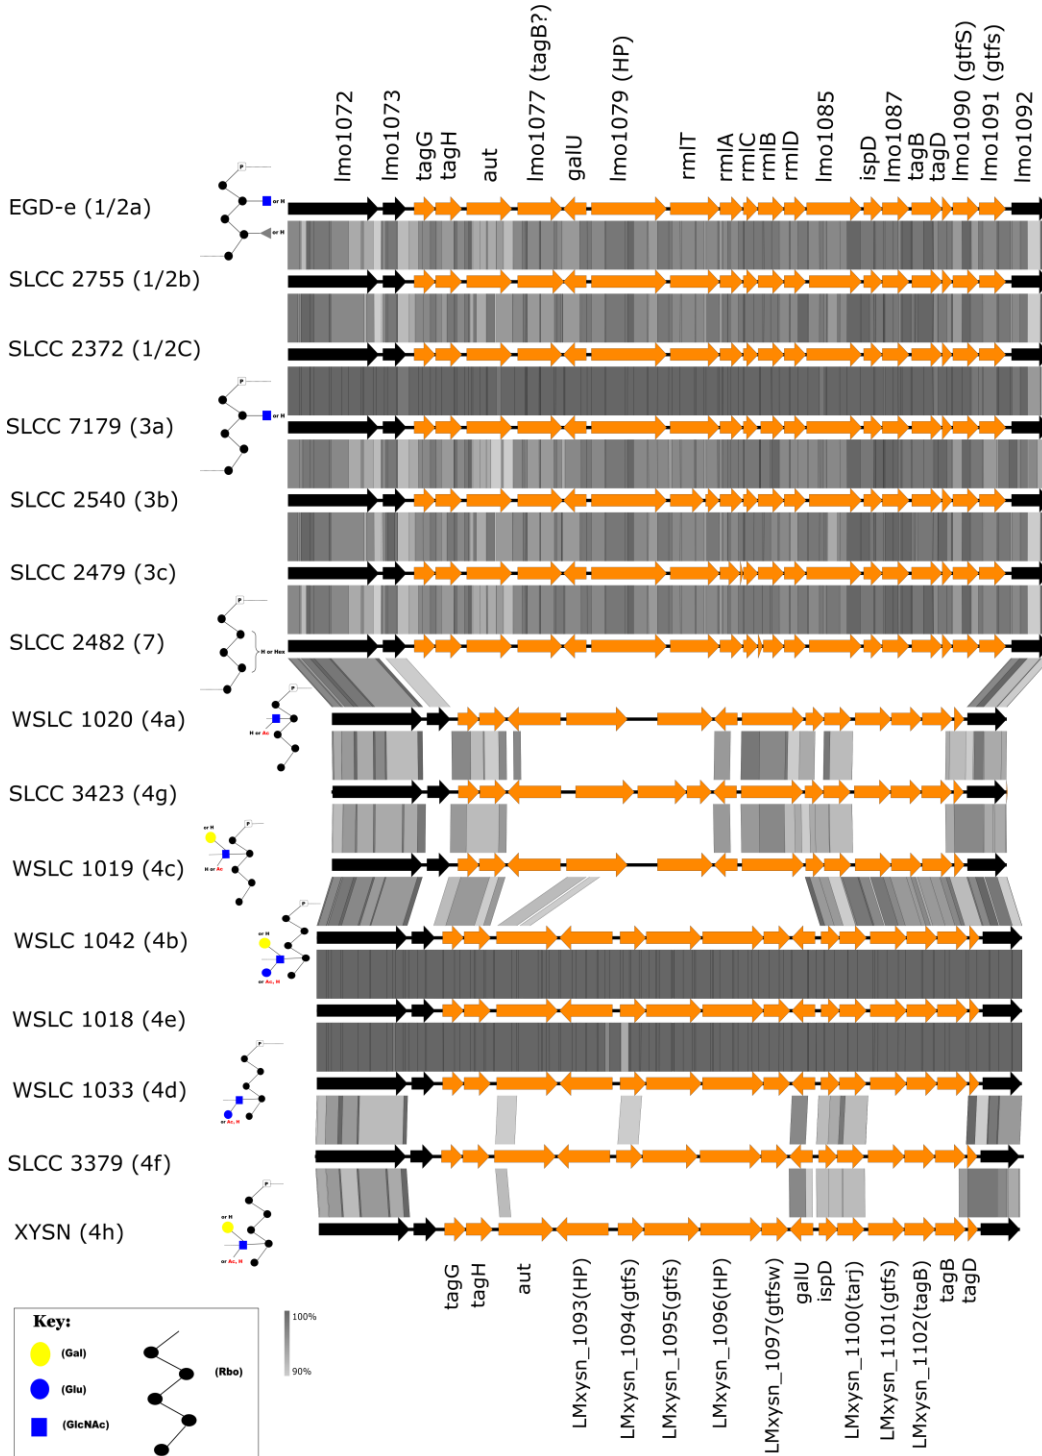

**Supplementary Figure 10: Distribution of wall teichoic acid decorating genes of *L. monocytogenes* XYSN (LMxysn\_1092-1104) in other lineages of *L. monocytogenes* and other *Listeria* species.** Left side: A UPGMA dendrogram based on average nucleotide identity of *Listeria* species. Right side: The BLAST Score Ratio (BSR) compared to the *L. monocytogenes* XYSN, from yellow (identical gene) to blue (similar gene not present). Note, that except for *L. monocytogenes* EGD-e (lineage II), other lineages- I, III and IV, and to lesser extent to a *L. marthi* exhibits nucleotide variants of LMxysn\_1092-1104. The BSR values were calculated by LS-BSR pipeline<sup>5</sup> and visualized in Phandango webserver<sup>6</sup>. Key: Lm – *L. monocytogenes*.

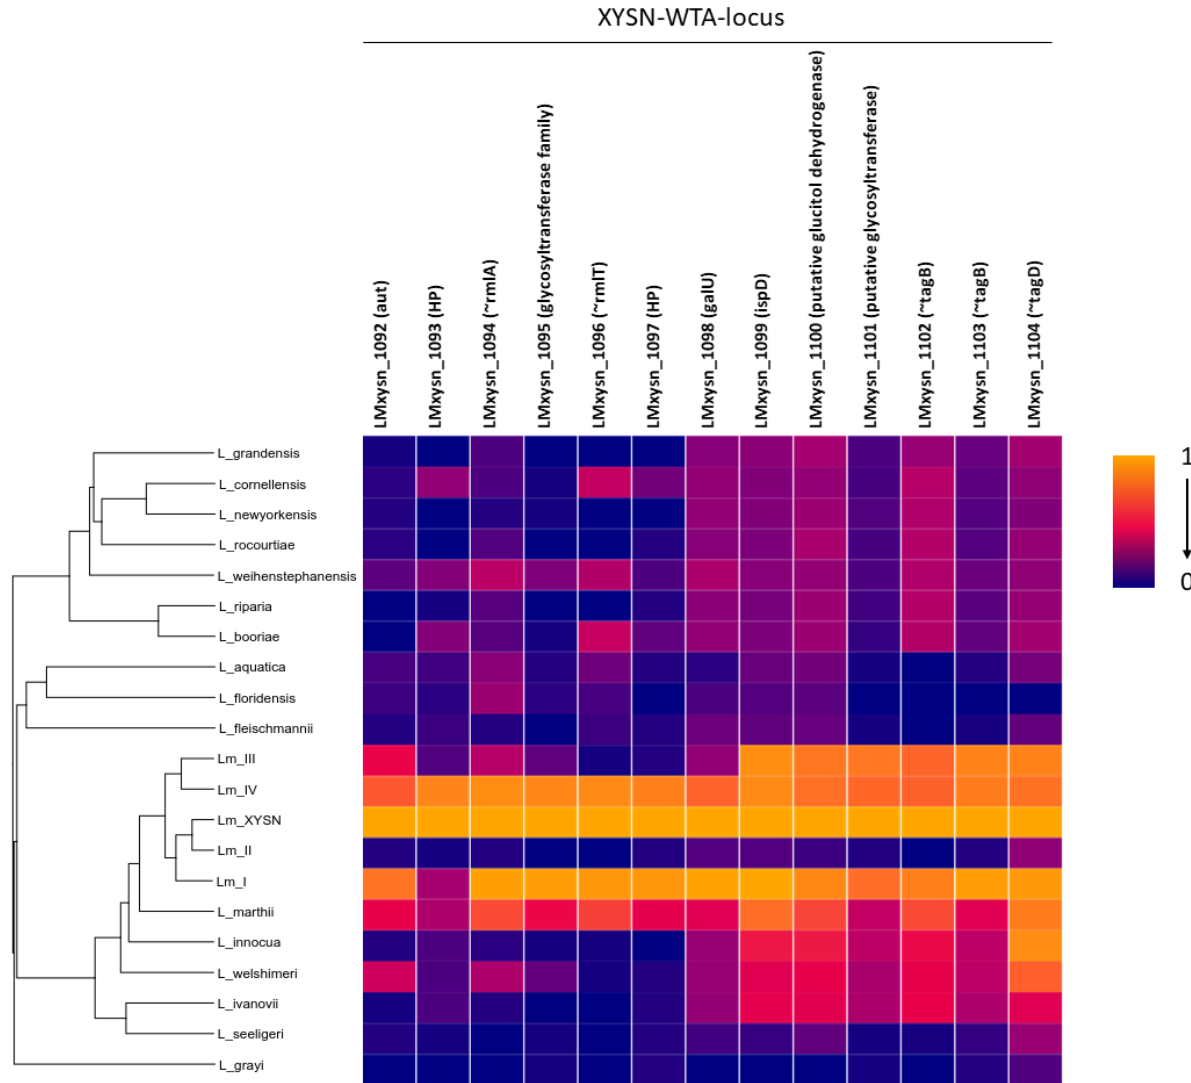



**Supplementary Table 1: Bacterial strains and plasmids used in this study**

| <b>Strain</b>                           | <b>Relevant characteristics</b>                       | <b>Reference/Source</b>                                  |
|-----------------------------------------|-------------------------------------------------------|----------------------------------------------------------|
| <i>L. monocytogenes</i> XYSN            | Wild type, serotypr 4h, CC33                          | This laboratory                                          |
| <i>L. monocytogenes</i> 15LG            | Wild type, serotypr 4h, CC33                          | This laboratory                                          |
| <i>L. monocytogenes</i> 16E             | Wild type, serotypr 4h, CC33                          | This laboratory                                          |
| <i>L. monocytogenes</i> EGD-e           | Wild type, serovar 1/2a, ST35                         | (Chakraborty et. al., 1992)                              |
| <i>L. monocytogenes</i> NTSN            | Wild type, serotype 4b, CC1                           | This laboratory                                          |
| <i>L. monocytogenes</i> LM11-00412      | Wild type, serotype 4b, CC1                           | Gifted by Prof. Lecuit                                   |
| <i>L. monocytogenes</i> LM13-00344      | Wild type, serotype 4b, CC4                           | Gifted by Prof. Lecuit                                   |
| <i>L. monocytogenes</i> LM6-01023       | Wild type, serotype 4b, CC6                           | Gifted by Prof. Lecuit                                   |
| <i>L. ivanovii</i> ZJU                  | Wild type, serotype 5                                 | Gifted by Prof. Weihuan Fang                             |
| <i>L. monocytogenes</i> 1042            | Wild type, serotype 4b                                | Preserved in laboratory of Food Microbiology, ETH Zurich |
| <i>Rhodococcus equi</i>                 | Wild type                                             | China General Microbiological Culture Collection Center  |
| <i>Escherichia coli</i> (DH5 $\alpha$ ) | Commercial strain used for cloning                    | Takara Biotechnology (Dalian) Co., Ltd.                  |
| pAUL-A                                  | Em <sup>R</sup>                                       | (Chakraborty et. al., 1992)                              |
| pIMK-2                                  | Km <sup>R</sup>                                       | Gifted by Ian R. Monk                                    |
| pERL3-GFP                               | Em <sup>R</sup>                                       | (Chakraborty et. al., 2011)                              |
| TnYLB-1                                 | Amp <sup>R</sup> , Km <sup>R</sup> , Spe <sup>R</sup> | (Fan H et. al., 2016)                                    |

**Supplementary Table 2: Bacterial strains constructed in this study**

| <b>Strain</b>            | <b>Relevant characteristics</b>                                                        | <b>Reference/Source</b> |
|--------------------------|----------------------------------------------------------------------------------------|-------------------------|
| $\Delta 1095$            | deletion <i>Lm_xysn</i> 1095 <sub>564-1791</sub>                                       | This study              |
| $\Delta 1095::1095$      | recombinant 1095 <sub>564-1791</sub> in <i>XYSN</i> $\Delta 1095$                      | This study              |
| <i>XYSN::gfp</i>         |                                                                                        | This study              |
| $\Delta 1095::gfp$       |                                                                                        | This study              |
| $\Delta 1095::1095::gfp$ |                                                                                        | This study              |
| $\Delta smcL$            | <i>smcL</i> absent in <i>Lm</i> <i>XYSN</i>                                            | This study              |
| $\Delta hly$             | <i>hly</i> absent in <i>Lm</i> <i>XYSN</i>                                             | This study              |
| $\Delta smcL\Delta hly$  | <i>smcL</i> and <i>hly</i> absent in <i>Lm</i> <i>XYSN</i>                             | This study              |
| <i>NTSN::smcL</i>        | recombinant <i>smcL</i> in the genome                                                  | This study              |
| <i>EGD-e::smcL</i>       | recombinant <i>smcL</i> in the genome                                                  | This study              |
| 1095:: <i>TnYLB-1</i>    | 43-bp length fragment inserted at the nucleotide site between 433 and 434 in 1095 gene | This study              |
| 1098:: <i>TnYLB-1</i>    | 55-bp length fragment inserted at the nucleotide site between 105 and 106 in 1098 gene | This study              |
| 0462:: <i>TnYLB-1</i>    | 55-bp length fragment inserted at the nucleotide site between 924 and 925 in 0462 gene | This study              |



**Supplementary Table 3: Primers used to amplify genes**

| <b>primers</b> | <b>Sequence</b>                                              | <b>length</b> |
|----------------|--------------------------------------------------------------|---------------|
| <i>1095P1</i>  | 5'-CGACGGCCAGTGAATTTCGAATACATTGGAAAAATCTTCAAAC-3             | 993bp         |
| <i>1095P2</i>  | 5'-ACTCTCCCTAATTCAAAATATATGTAAAGTCATAACTCTCTGCGATTGG-3       |               |
| <i>1095P3</i>  | 5'-CCAATCGCAGAGAGTTATGACTTTACATATATTTTGAATTAGGGAGAGT-3       | 903bp         |
| <i>1095P4</i>  | 5'-TGCAGGTCGACTCTAGAGTTTTCACTTTTCTTACTTTCAATA-3              |               |
| <i>1095W1</i>  | 5'-TTATGTTTGTAGATGATGGAAGT-3                                 | 2596/3825bp   |
| <i>1095W2</i>  | 5'-CCAAAGCTCAACACTAGATACTC-3                                 |               |
| <i>H1095P1</i> | 5'-TGTA AACGACGGCCAGTGAATTCTAGATTGAATACAAAAGGAGATGGTG-3      | 1930bp        |
| <i>H1095P2</i> | 5'-ATAGACTCTCCCTAATTCAAAAAATGTGTCATCTATTATCTCCAGTTTTCTTC-3   |               |
| <i>H1095P3</i> | 5'-GAAGGAAA ACTGGAGATAATAGATGACACATTTTTTGAATTAGGGAGAGTCTAT-3 | 903bp         |
| <i>H1095P4</i> | 5'-GCATGCCTGCAGGTCGACTCTAGAGTTTTCACTTTTCTTACTTTCAATA-3       |               |
| <i>H1095W1</i> | 5'-CAGCGAGAGATAGGTGTAAAGAGAG-3                               | 3094/1865bp   |
| <i>H1095W2</i> | 5'-ATGTTTAGGAAGTCATCTGATTTGG-3                               |               |
| <i>hly P1</i>  | 5'-CGGCCAGTGAATTCGAGCTCGGTACCCTCGTGTGTCAGTTCTGGGAGTAGT -3    | 786bp         |
| <i>hly P2</i>  | 5'-TCCTAATTTTTATTGCTTTTAAAAGGGTTTCACTCTCCTTCTA -3            |               |
| <i>hly P3</i>  | 5'-TAGAAGGAGAGTGAAACCCTTTTAAAAGCAATAAAAATTAGGA -3            | 785bp         |
| <i>hly P4</i>  | 5'-TCGACTCTAGAGGATCCCCGGGTACCTTTCTTTCACTGGATTTCCGATA -3      |               |
| <i>hly wP1</i> | 5'- TCGGACCATTGTAGTCATCTTG -3                                | 3397(1807)bp  |
| <i>hly wP2</i> | 5'- TCCA ACTCGCAACGTCCG -3                                   |               |
| <i>hly nP1</i> | 5'- CACCACCAGCATCTCCGC -3                                    | 860bp         |
| <i>hly nP2</i> | 5'- TTTCCCACTTACGGCAGC -3                                    |               |
| <i>smcL P1</i> | 5'- CTAGTCTAGAGGACATTTTCATTACATTTTTTGGT -3                   | 806bp         |
| <i>smcL P2</i> | 5'-TTCATTAAAAATGATGGAGGAAATAAAACAGCTACAATTTTA -3             |               |
| <i>smcL P3</i> | 5'-TAAAATTGTAGCTGTTTTATTTCTCCATCATTTTTAATGAA -3              | 759bp         |
| <i>smcL P4</i> | 5'-ACGCGTCGACATTATCCAAACTGAGTATCGCCA -3                      |               |

|                   |                                                                      |             |
|-------------------|----------------------------------------------------------------------|-------------|
| <i>smcLwP1</i>    | 5'-TGTAACACCCAATCGGCAGT -3                                           | 1809(801)bp |
| <i>smcLwP2</i>    | 5'-TAATTGGTAGCGGCTGTGTA -3                                           |             |
| <i>smcLnP1</i>    | 5'-ATGAATGTGGAAGTGCGTGAT -3                                          | 845bp       |
| <i>smcLnP2</i>    | 5'-CGGTGCTTTCATTTTTTTACTCTT -3                                       |             |
| <i>smcL pimk1</i> | 5'-GGTTAAAAAATGTAGAAGGAGAGTGAAACCCTGCAGATGGAAAAATTTAAAATTATAAAAAC -3 | 1076bp      |
| <i>smcL pimk2</i> | 5'-AACAAAAGCTGGGTACCGGGCCCCCCTCGAGTTAGTTATTATCAGTAAAACCAAC -3        |             |

---

**Supplementary Table 4: Accession numbers of the closed genomes of 144 *L. monocytogenes* strains used in this study.**

| <b>Accession number</b> | <b>Lineage</b> |
|-------------------------|----------------|
| NZ_CP007462             |                |
| NZ_CP008821             |                |
| NZ_CP019616             |                |
| NC_017728               |                |
| NC_012488               |                |
| NC_018642               |                |
| NZ_CP011004             |                |
| NC_018584               |                |
| NZ_CP013288             |                |
| NZ_CP018149             |                |
| NZ_CP019619             |                |
| NZ_CP013289             |                |
| NZ_CP018148             |                |
| NZ_CM001159             |                |
| NZ_CP012021             |                |
| NZ_CP015508             |                |
| NC_021827               |                |
| NC_021830               |                |
| NC_021840               |                |
| NC_021839               |                |
| NZ_CP019625             |                |
| NZ_CP007600             |                |
| NZ_CP010346             |                |
| NC_002973               |                |
| NZ_CP009897             |                |
| NZ_CP013285             |                |
| NC_018585               |                |
| NZ_CP007210             |                |
| NZ_CP007167             |                |
| NZ_CP007525             |                |
| NZ_CP006874             |                |
| NZ_CP007526             |                |
| NC_021825               |                |
| NZ_CP007492             |                |
| NC_019556               |                |
| NZ_CP019620             |                |
| NZ_CP007459             |                |
| NZ_CP007461             |                |
| NZ_CP007460             |                |
| NZ_CP020774             |                |
| NZ_CP019615             |                |
| NZ_CP015593             |                |
| NZ_CP007168             |                |
| NZ_CP007169             |                |
| NZ_CP016213             |                |
| NZ_CP011398             |                |
| NZ_CP022020             |                |
| NZ_CP023050             |                |

|             |    |
|-------------|----|
| NZ_CP023052 | I  |
| NZ_CP014252 | I  |
| NC_021824   | I  |
| NZ_CP014250 | I  |
| NZ_CP019624 | I  |
| NZ_CP019622 | I  |
| NZ_CP007686 | I  |
| NC_018586   | I  |
| NZ_CP016629 | I  |
| NC_018591   | I  |
| NC_021826   | I  |
| NC_018587   | I  |
| NC_021838   | I  |
| NC_017547   | II |
| NC_021823   | II |
| NZ_CP020827 | II |
| NZ_CP020830 | II |
| NZ_CP013723 | II |
| NZ_CM003382 | II |
| NZ_CP011345 | II |
| NC_003210   | II |
| NZ_CP023754 | II |
| NZ_CP023752 | II |
| NZ_CP007196 | II |
| NZ_CP007195 | II |
| NZ_CP007194 | II |
| NC_018589   | II |
| NC_018588   | II |
| NC_017546   | II |
| NZ_CP020832 | II |
| NZ_CP007687 | II |
| NZ_CP019614 | II |
| NZ_CP011397 | II |
| NZ_CP007198 | II |
| NZ_CP007197 | II |
| NZ_CP013722 | II |
| NZ_CP020828 | II |
| NZ_CP019623 | II |
| NZ_CP020831 | II |
| NC_021837   | II |
| NZ_CP007200 | II |
| NZ_CP007199 | II |
| NZ_CP007689 | II |
| NZ_CP007685 | II |
| NC_017544   | II |
| NZ_CP007171 | II |
| NZ_CP007170 | II |
| NZ_CP007688 | II |
| NZ_CP007684 | II |
| NC_018592   | II |
| NZ_CP007160 | II |
| NC_022568   | II |
| NZ_CP014261 | II |
| NZ_CP014790 | II |

|             |     |
|-------------|-----|
| NZ_CP020833 | II  |
| NZ_CP019617 | II  |
| NC_017545   | II  |
| NC_018593   | II  |
| NZ_CP019621 | II  |
| NZ_CP009258 | II  |
| NZ_CP018685 | II  |
| NZ_CP007017 | II  |
| NZ_CP006861 | II  |
| NZ_CP007018 | II  |
| NZ_CP008837 | II  |
| NZ_CP019170 | II  |
| NC_013768   | II  |
| NZ_CP019164 | II  |
| NZ_CP007007 | II  |
| NZ_CP007011 | II  |
| NZ_CP019618 | II  |
| NZ_CP006862 | II  |
| NZ_CP007019 | II  |
| NZ_CP019167 | II  |
| NZ_CP007009 | II  |
| NZ_CP008836 | II  |
| NZ_CP006858 | II  |
| NZ_CP006859 | II  |
| NZ_CP006860 | II  |
| NZ_CP007010 | II  |
| NZ_CP007008 | II  |
| NZ_CP007021 | II  |
| NC_013766   | II  |
| NZ_CP019165 | II  |
| NZ_CP007020 | II  |
| NZ_CP013919 | II  |
| NZ_CP013724 | II  |
| NZ_CP009242 | III |
| NC_017529   | III |
| NC_011660   | III |
| NC_017537   | III |
| NC_018590   | III |
| NZ_CP013287 | III |
| NZ_CP013286 | III |
| NZ_CM001469 | IV  |
| NZ_CM001046 | IV  |

---

**Supplementary Table 5: Slide agglutination patterns of *Listeria* strains using *Listeria* O and H antisera**

| Strains | O antigen |      |    |      |    |     |      |    | H antigen |       |     |     |
|---------|-----------|------|----|------|----|-----|------|----|-----------|-------|-----|-----|
|         | I         | I/II | IV | V/VI | VI | VII | VIII | IX | H-A       | H-A/B | H-C | H-D |
| XYSN    | -         | -    | -  | +    | +  | -   | -    | -  | +         | +     | -   | -   |
| 15LG    | -         | -    | -  | +    | +  | -   | -    | -  | +         | +     | -   | -   |
| 16E     | -         | -    | -  | +    | +  | -   | -    | -  | +         | +     | -   | -   |
| NTSN    | -         | -    | -  | +    | +  | -   | -    | -  | +         | +     | +   | -   |

**Supplementary Table 6: Antimicrobial susceptibility testing**

|             | AMP | CHL | CIP | CLI | ERY | GEN | IPM | PEN | RIF | STR | TET | SXT | VAN |
|-------------|-----|-----|-----|-----|-----|-----|-----|-----|-----|-----|-----|-----|-----|
| XYSN        | 34  | 30  | 25  | 16  | 37  | 28  | 43  | 34  | 27  | 17  | 32  | 36  | 26  |
| Sensitivity | S   | S   | S   | I   | S   | S   | S   | S   | S   | S   | S   | S   | S   |

Note: S: Susceptible; R: Resistant; I: Intermediate; Unit of measurement (millimeter, mm); Abbreviations: AMP, ampicillin; PEN, penicillin G; IPM, imipenem; CIP, ciprofloxacin; TET, tetracycline; ERY, erythromycin; STR, streptomycin; GEN, gentamycin; RIF, rifampin; VAN, vancomycin; CHL, chloramphenicol; SXT, trimethoprim-sulfamethoxazole; CLI, clindamycin.

**Supplementary Table 7: Virulence genes in *L. monocytogenes* XYSN determined by blastp against virulence factor database (VFDB)<sup>7</sup>. The additional virulence gene *smcL* identified is highlighted.**

| sseqid    | qseqid        | evalue | pident | qcovs | gene     | protein                                       | originated-from                      |
|-----------|---------------|--------|--------|-------|----------|-----------------------------------------------|--------------------------------------|
| VFG006838 | Lm_XYSN_00060 | 0      | 99.77  | 100   | agrC     | hypothetical protein                          | <i>L. monocytogenes</i> EGD-e        |
| VFG006834 | Lm_XYSN_00061 | 4E-179 | 99.17  | 100   | agrA     | hypothetical protein                          | <i>L. monocytogenes</i> EGD-e        |
| VFG000072 | Lm_XYSN_00220 | 4E-174 | 99.16  | 100   | prfA     | listeriolysin positive regulatory protein     | <i>L. monocytogenes</i> EGD-e        |
| VFG032323 | Lm_XYSN_00221 | 0      | 96.21  | 100   | plcA     | phosphatidylinositol-specific phospholipase C | <i>L. monocytogenes</i> SLCC2376     |
| VFG032270 | Lm_XYSN_00222 | 0      | 97.73  | 100   | hly      | listeriolysin O                               | <i>L. monocytogenes</i> SLCC2376     |
| VFG032285 | Lm_XYSN_00223 | 0      | 96.86  | 100   | mpl      | zinc metalloproteinase                        | <i>L. monocytogenes</i> SLCC5850     |
| VFG000068 | Lm_XYSN_00224 | 0      | 83.91  | 99    | actA     | actin-assembly inducing protein precursor     | <i>L. monocytogenes</i> EGD-e        |
| VFG032340 | Lm_XYSN_00225 | 0      | 97.58  | 100   | plcB     | phosphatidylcholine-specific phospholipase C  | <i>L. monocytogenes</i> SLCC7179     |
| VFG000079 | Lm_XYSN_00268 | 0      | 100    | 100   | clpC     | endopeptidase Clp ATP-binding chain C         | <i>L. monocytogenes</i> EGD-e        |
| VFG033049 | Lm_XYSN_00432 | 0      | 97     | 100   | pdgA     | polysaccharide deacetylase                    | <i>L. monocytogenes</i> Finland 1998 |
| VFG031991 | Lm_XYSN_00473 | 0      | 97     | 100   | inlA     | internalin A                                  | <i>L. monocytogenes</i> SLCC7179     |
| VFG032025 | Lm_XYSN_00474 | 0      | 95.24  | 100   | inlB     | internalin B                                  | <i>L. monocytogenes</i> J1816        |
| VFG032985 | Lm_XYSN_00477 | 6E-141 | 97.56  | 100   | IntA     | hypothetical protein                          | <i>L. monocytogenes</i> Finland 1998 |
| VFG032102 | Lm_XYSN_00610 | 0      | 99.58  | 100   | iap/cwhA | p60                                           | <i>L. monocytogenes</i> J0161        |
| VFG043247 | Lm_XYSN_00712 | 0      | 98.43  | 100   | fliP     | flagellar biosynthesis protein FliP           | <i>L. monocytogenes</i> EGD-e        |
| VFG043249 | Lm_XYSN_00714 | 3E-177 | 100    | 100   | fliR     | flagellar biosynthesis protein FliR           | <i>L. monocytogenes</i> EGD-e        |
| VFG043250 | Lm_XYSN_00715 | 0      | 99.71  | 100   | flhB     | flagellar biosynthesis protein FlhB           | <i>L. monocytogenes</i> EGD-e        |
| VFG043251 | Lm_XYSN_00716 | 0      | 99.86  | 100   | flhA     | flagellar biosynthesis protein FlhA           | <i>L. monocytogenes</i> EGD-e        |
| VFG043252 | Lm_XYSN_00717 | 0      | 100    | 100   | flhF     | flagellar biosynthesis regulator FlhF         | <i>L. monocytogenes</i> EGD-e        |
| VFG043253 | Lm_XYSN_00718 | 0      | 99.23  | 100   | flgG     | flagellar basal body rod protein FlgG         | <i>L. monocytogenes</i> EGD-e        |
| VFG043254 | Lm_XYSN_00719 | 0      | 100    | 100   | cheR     | hypothetical protein                          | <i>L. monocytogenes</i> EGD-e        |
| VFG043255 | Lm_XYSN_00721 | 0      | 100    | 100   | motA     | flagellar motor protein MotA                  | <i>L. monocytogenes</i> EGD-e        |
| VFG043256 | Lm_XYSN_00722 | 0      | 98.91  | 100   | motB     | hypothetical protein                          | <i>L. monocytogenes</i> EGD-e        |
| VFG043257 | Lm_XYSN_00725 | 0      | 100    | 100   | cheV     | hypothetical protein                          | <i>L. monocytogenes</i> EGD-e        |
| VFG043258 | Lm_XYSN_00726 | 0      | 100    | 100   | flaA     | flagellin                                     | <i>L. monocytogenes</i> EGD-e        |
| VFG006842 | Lm_XYSN_00728 | 0      | 99.84  | 100   | cheA     | two-component sensor histidine kinase CheA    | <i>L. monocytogenes</i> EGD-e        |
| VFG043261 | Lm_XYSN_00733 | 0      | 99.51  | 100   | flgE     | flagellar hook protein FlgE                   | <i>L. monocytogenes</i> EGD-e        |
| VFG043263 | Lm_XYSN_00735 | 0      | 99.7   | 100   | fliM     | flagellar motor switch protein FliM           | <i>L. monocytogenes</i> EGD-e        |
| VFG043264 | Lm_XYSN_00736 | 0      | 99.61  | 100   | lmo0700  | flagellar motor switch protein                | <i>L. monocytogenes</i> EGD-e        |
| VFG043265 | Lm_XYSN_00741 | 0      | 99.6   | 100   | flgK     | flagellar hook-associated protein FlgK        | <i>L. monocytogenes</i> EGD-e        |
| VFG043266 | Lm_XYSN_00742 | 0      | 99.66  | 100   | flgL     | flagellar hook-associated protein FlgL        | <i>L. monocytogenes</i> EGD-e        |
| VFG043267 | Lm_XYSN_00743 | 0      | 99.07  | 100   | fliD     | flagellar capping protein                     | <i>L. monocytogenes</i> EGD-e        |
| VFG043272 | Lm_XYSN_00749 | 0      | 99.45  | 100   | fliF     | flagellar MS-ring protein                     | <i>L. monocytogenes</i> EGD-e        |

|           |               |        |       |     |       |                                                    |                                         |
|-----------|---------------|--------|-------|-----|-------|----------------------------------------------------|-----------------------------------------|
| VFG043273 | Lm_XYSN_00750 | 0      | 99.73 | 100 | fliG  | flagellar motor switch protein G                   | <i>L. monocytogenes</i> EGD-e           |
| VFG043274 | Lm_XYSN_00751 | 3E-167 | 100   | 100 | fliH  | flagellar assembly protein H                       | <i>L. monocytogenes</i> EGD-e           |
| VFG043275 | Lm_XYSN_00752 | 0      | 99.31 | 100 | fliI  | flagellum-specific ATP synthase                    | <i>L. monocytogenes</i> EGD-e           |
| VFG032167 | Lm_XYSN_00871 | 0      | 99.78 | 100 | hpt   | sugar phosphate transporter                        | <i>L. monocytogenes</i> Finland 1998    |
| VFG006798 | Lm_XYSN_00967 | 1E-161 | 100   | 100 | srtA  | hypothetical protein                               | <i>L. monocytogenes</i> EGD-e           |
| VFG002158 | Lm_XYSN_00969 | 0      | 100   | 100 | lplA1 | lipoate protein ligase                             | <i>L. monocytogenes</i> EGD-e           |
| VFG032812 | Lm_XYSN_01013 | 0      | 100   | 100 | dltA  | D-alanine--poly(phosphoribitol                     | <i>L. monocytogenes</i> 10403S          |
| VFG000080 | Lm_XYSN_01037 | 0      | 99.59 | 100 | clpE  | ATP-dependent protease                             | <i>L. monocytogenes</i> EGD-e           |
| VFG000674 | Lm_XYSN_01259 | 0      | 94.33 | 100 | smcL  | sphingomyelinase-c                                 | <i>L. ivanovii</i> str. ATCC 19119      |
| VFG033003 | Lm_XYSN_01319 | 0      | 99.68 | 100 | oatA  | O-acetyltransferase                                | <i>L. monocytogenes</i> SLCC2540        |
| VFG006826 | Lm_XYSN_01407 | 5E-162 | 100   | 100 | lisR  | two-component response regulator                   | <i>L. monocytogenes</i> EGD-e           |
| VFG006830 | Lm_XYSN_01408 | 0      | 99.79 | 100 | lisK  | two-component sensor histidine kinase              | <i>L. monocytogenes</i> EGD-e           |
| VFG031937 | Lm_XYSN_01680 | 0      | 100   | 100 | lap   | bifunctional aldehyde-alcohol dehydrogenase        | <i>L. monocytogenes</i> SLCC5850        |
| VFG032574 | Lm_XYSN_01823 | 0      | 99.71 | 100 | virS  | hypothetical protein                               | <i>L. monocytogenes</i> 08-5578         |
| VFG006818 | Lm_XYSN_01827 | 2E-165 | 100   | 100 | virR  | hypothetical protein                               | <i>L. monocytogenes</i> EGD-e           |
| VFG032911 | Lm_XYSN_01871 | 0      | 97.98 | 100 | inlC  | internalin family protein                          | <i>L. monocytogenes</i> F2365           |
| VFG006794 | Lm_XYSN_01913 | 0      | 100   | 100 | stp   | hypothetical protein                               | <i>L. monocytogenes</i> EGD-e           |
| VFG002160 | Lm_XYSN_01921 | 0      | 99.82 | 100 | fbpA  | fibronectin-binding protein                        | <i>L. monocytogenes</i> EGD-e           |
| VFG002161 | Lm_XYSN_01937 | 1E-107 | 100   | 100 | lspA  | signal peptidase II                                | <i>L. monocytogenes</i> EGD-e           |
| VFG032074 | Lm_XYSN_01940 | 0      | 99.68 | 100 | lpeA  | manganese-binding lipoprotein mntA                 | <i>L. monocytogenes</i> Finland 1998    |
| VFG002162 | Lm_XYSN_02160 | 0      | 99.69 | 100 | bsh   | bile salt hydrolase                                | <i>L. monocytogenes</i> EGD-e           |
| VFG032414 | Lm_XYSN_02290 | 9E-180 | 98.37 | 100 | srtB  | hypothetical protein                               | <i>L. monocytogenes</i> 08-5578         |
| VFG001090 | Lm_XYSN_02294 | 0      | 100   | 100 | hbp2  | hemin/hemoglobin-binding protein 2                 | <i>L. monocytogenes</i> EGD-e           |
| VFG045468 | Lm_XYSN_02295 | 3E-148 | 99.52 | 100 | hdp1  | Haemoglobin binding protein 1                      | <i>L. monocytogenes</i> EGD-e           |
| VFG006782 | Lm_XYSN_02305 | 0      | 100   | 100 | oppA  | hypothetical protein                               | <i>L. monocytogenes</i> EGD-e           |
| VFG032879 | Lm_XYSN_02328 | 0      | 99.66 | 100 | prsA2 | protein export protein                             | <i>L. monocytogenes</i> serotype. F2365 |
| VFG000077 | Lm_XYSN_02543 | 1E-143 | 100   | 100 | clpP  | ATP-dependent Clp protease proteolytic subunit     | <i>L. monocytogenes</i> EGD-e           |
| Lmo2470   | Lm_XYSN_02543 | 0      | 91    | 100 | inlP  | Internalin P                                       | <i>L. monocytogenes</i> EGD-e           |
| VFG006806 | Lm_XYSN_02557 | 0      | 100   | 100 | lgt   | hypothetical protein                               | <i>L. monocytogenes</i> EGD-e           |
| VFG032863 | Lm_XYSN_02624 | 8E-101 | 100   | 100 | gtcA  | cell wall teichoic acid glycosylation protein gtcA | <i>L. monocytogenes</i> J1816           |
| VFG031981 | Lm_XYSN_02970 | 0      | 98.71 | 100 | inlJ  | internalin                                         | <i>L. monocytogenes</i> J0161           |



**Supplementary Table 8: Pan genome comparison of HSL- II strains (XYSN, 15LG and 16E) using Roary<sup>8</sup>.**

| <b>Annotation</b>                            | <b>15LG</b> | <b>16E</b> | <b>XYSN</b>   |
|----------------------------------------------|-------------|------------|---------------|
| hypothetical protein                         | 15LG_00102  | 16E_00115  |               |
| hypothetical protein                         |             | 16E_00990  | Lm_XYSN_00980 |
| PTS system glucose-specific EIICBA component |             | 16E_01086  | Lm_XYSN_01076 |
| hypothetical protein                         |             | 16E_00182  | Lm_XYSN_00166 |
| hypothetical protein                         |             | 16E_00183  | Lm_XYSN_00167 |
| Bacillus transposase protein                 | 15LG_00109  |            | Lm_XYSN_00095 |
| hypothetical protein                         |             | 16E_02992  | Lm_XYSN_02170 |
| hypothetical protein                         | 15LG_00234  | 16E_00257  |               |
| hypothetical protein                         | 15LG_02923  | 16E_02947  |               |
| hypothetical protein                         | 15LG_02931  | 16E_02980  |               |
| Transposase                                  | 15LG_02924  |            | Lm_XYSN_01318 |
| hypothetical protein                         |             | 16E_02991  | Lm_XYSN_02171 |
| hypothetical protein                         | 15LG_00915  |            | Lm_XYSN_00875 |
| hypothetical protein                         | 15LG_01661  | 16E_01636  |               |
| hypothetical protein                         | 15LG_02925  |            | Lm_XYSN_01317 |
| hypothetical protein                         |             | 16E_00415  | Lm_XYSN_00398 |
| hypothetical protein                         |             | 16E_00186  | Lm_XYSN_00498 |
| hypothetical protein                         | 15LG_00387  |            | Lm_XYSN_00397 |
| hypothetical protein                         |             | 16E_00474  | Lm_XYSN_00457 |
| hypothetical protein                         |             | 16E_00476  | Lm_XYSN_00459 |
| hypothetical protein                         |             | 16E_00675  | Lm_XYSN_00670 |
| hypothetical protein                         |             | 16E_00676  | Lm_XYSN_00671 |
| hypothetical protein                         |             | 16E_00677  | Lm_XYSN_00672 |
| Matrixin                                     |             | 16E_00801  | Lm_XYSN_00797 |
| hypothetical protein                         |             | 16E_00802  | Lm_XYSN_00798 |
| hypothetical protein                         |             | 16E_00805  | Lm_XYSN_00800 |
| VanZ like family protein                     |             | 16E_00806  | Lm_XYSN_00801 |
| hypothetical protein                         |             | 16E_00807  | Lm_XYSN_00802 |
| Internalin B precursor                       |             | 16E_02626  | Lm_XYSN_02668 |
| preprotein translocase subunit SecB          |             | 16E_02627  | Lm_XYSN_02669 |
| hypothetical protein                         |             | 16E_02628  | Lm_XYSN_02670 |
| hypothetical protein                         |             | 16E_02629  | Lm_XYSN_02671 |
| hypothetical protein                         |             | 16E_02636  | Lm_XYSN_02678 |
| hypothetical protein                         |             | 16E_02637  | Lm_XYSN_02679 |
| hypothetical protein                         |             | 16E_02638  | Lm_XYSN_02680 |
| Phage-related minor tail protein             |             | 16E_02639  | Lm_XYSN_02681 |
| hypothetical protein                         |             | 16E_02640  | Lm_XYSN_02682 |
| hypothetical protein                         |             | 16E_02641  | Lm_XYSN_02683 |
| Bacterial Ig-like domain (group 2)           |             | 16E_02642  | Lm_XYSN_02684 |

|                                         |            |           |               |
|-----------------------------------------|------------|-----------|---------------|
| hypothetical protein                    |            | 16E_02643 | Lm_XYSN_02685 |
| hypothetical protein                    |            | 16E_02644 | Lm_XYSN_02686 |
| hypothetical protein                    |            | 16E_02645 | Lm_XYSN_02687 |
| hypothetical protein                    |            | 16E_02646 | Lm_XYSN_02688 |
| hypothetical protein                    |            | 16E_02647 | Lm_XYSN_02689 |
| hypothetical protein                    |            | 16E_02648 | Lm_XYSN_02690 |
| hypothetical protein                    |            | 16E_02649 | Lm_XYSN_02691 |
| hypothetical protein                    |            | 16E_02650 | Lm_XYSN_02692 |
| Phage minor capsid protein 2            |            | 16E_02651 | Lm_XYSN_02693 |
| Phage portal protein, SPP1 Gp6-like     |            | 16E_02652 | Lm_XYSN_02694 |
| Terminase-like family protein           |            | 16E_02653 | Lm_XYSN_02695 |
| Phage terminase small subunit           |            | 16E_02654 | Lm_XYSN_02696 |
| hypothetical protein                    |            | 16E_02655 | Lm_XYSN_02697 |
| hypothetical protein                    |            | 16E_02656 | Lm_XYSN_02698 |
| hypothetical protein                    |            | 16E_02657 | Lm_XYSN_02699 |
| hypothetical protein                    |            | 16E_02658 | Lm_XYSN_02700 |
| hypothetical protein                    |            | 16E_02659 | Lm_XYSN_02701 |
| hypothetical protein                    |            | 16E_02660 | Lm_XYSN_02702 |
| Single-stranded DNA-binding protein A   |            | 16E_02661 | Lm_XYSN_02703 |
| hypothetical protein                    |            | 16E_02662 | Lm_XYSN_02704 |
| hypothetical protein                    |            | 16E_02663 | Lm_XYSN_02705 |
| hypothetical protein                    |            | 16E_02664 | Lm_XYSN_02706 |
| recombination and repair protein RecT   |            | 16E_02665 | Lm_XYSN_02707 |
| DNA replication and repair protein RecF |            | 16E_02666 | Lm_XYSN_02708 |
| hypothetical protein                    |            | 16E_02667 | Lm_XYSN_02709 |
| hypothetical protein                    |            | 16E_02668 | Lm_XYSN_02710 |
| hypothetical protein                    |            | 16E_02669 | Lm_XYSN_02711 |
| hypothetical protein                    |            | 16E_02670 | Lm_XYSN_02712 |
| hypothetical protein                    |            | 16E_02671 | Lm_XYSN_02713 |
| hypothetical protein                    |            | 16E_02672 | Lm_XYSN_02714 |
| hypothetical protein                    |            | 16E_02673 | Lm_XYSN_02715 |
| HTH-type transcriptional regulator Xre  |            | 16E_02674 | Lm_XYSN_02716 |
| hypothetical protein                    |            | 16E_02675 | Lm_XYSN_02717 |
| hypothetical protein                    |            | 16E_02676 | Lm_XYSN_02718 |
| Tyrosine recombinase XerD               |            | 16E_02677 | Lm_XYSN_02719 |
| hypothetical protein                    |            | 16E_02958 | Lm_XYSN_00084 |
| hypothetical protein                    |            | 16E_02962 | Lm_XYSN_00461 |
| hypothetical protein                    | 15LG_02940 | 16E_02993 |               |
| Transposase, Mutator family             |            | 16E_00803 | Lm_XYSN_00799 |
| hypothetical protein                    | 15LG_02446 |           | Lm_XYSN_02458 |
| hypothetical protein                    | 15LG_02448 |           | Lm_XYSN_02460 |
| hypothetical protein                    | 15LG_02447 |           | Lm_XYSN_02459 |

|                                                  |            |           |               |
|--------------------------------------------------|------------|-----------|---------------|
| hypothetical protein                             | 15LG_00101 | 16E_00114 |               |
| hypothetical protein                             | 15LG_00108 |           | Lm_XYSN_00094 |
| Putative HTH-type transcriptional regulator YwnA | 15LG_00463 | 16E_00491 |               |
| Putative HTH-type transcriptional regulator YwnA |            | 16E_00488 | Lm_XYSN_00475 |
| hypothetical protein                             | 15LG_02934 |           |               |
| hypothetical protein                             |            | 16E_00895 |               |
| Protoporphyrinogen oxidase                       |            | 16E_02988 |               |
| Isocitrate dehydrogenase [NADP]                  |            |           | Lm_XYSN_01609 |
| hypothetical protein                             | 15LG_02849 |           |               |
| hypothetical protein                             | 15LG_02885 |           |               |
| Integrase core domain protein                    |            |           | Lm_XYSN_00119 |
| Transposase, Mutator family                      |            |           | Lm_XYSN_00171 |
| Transposase, Mutator family                      |            |           | Lm_XYSN_00396 |
| Transposase, Mutator family                      |            |           | Lm_XYSN_02536 |
| hypothetical protein                             |            |           | Lm_XYSN_00495 |
| tRNA(Glu)-specific nuclease WapA                 |            | 16E_02961 |               |
| tRNA(Glu)-specific nuclease WapA                 |            | 16E_02963 |               |
| tRNA(Glu)-specific nuclease WapA precursor       |            |           | Lm_XYSN_00456 |
| tRNA(Glu)-specific nuclease WapA precursor       |            |           | Lm_XYSN_00460 |
| hypothetical protein                             |            |           | Lm_XYSN_00496 |
| tRNA <sup>3</sup> (Ser)-specific nuclease WapA   |            | 16E_00475 |               |
| hypothetical protein                             | 15LG_00446 |           |               |
| hypothetical protein                             | 15LG_00103 |           |               |
| hypothetical protein                             | 15LG_00104 |           |               |
| hypothetical protein                             | 15LG_00105 |           |               |
| hypothetical protein                             | 15LG_00106 |           |               |
| hypothetical protein                             | 15LG_00442 |           |               |
| hypothetical protein                             | 15LG_00443 |           |               |
| hypothetical protein                             | 15LG_00444 |           |               |
| Transposase from transposon Tn916                | 15LG_00647 |           |               |
| hypothetical protein                             | 15LG_00648 |           |               |
| hypothetical protein                             | 15LG_00649 |           |               |
| hypothetical protein                             | 15LG_00650 |           |               |
| hypothetical protein                             | 15LG_00651 |           |               |
| Transposase                                      |            |           | Lm_XYSN_01631 |
| hypothetical protein                             | 15LG_00652 |           |               |
| Transposase                                      |            |           | Lm_XYSN_01767 |
| Transposase                                      |            |           | Lm_XYSN_01814 |
| hypothetical protein                             | 15LG_00653 |           |               |
| hypothetical protein                             | 15LG_00654 |           |               |
| hypothetical protein                             | 15LG_00655 |           |               |
| hypothetical protein                             | 15LG_00656 |           |               |

|                                      |            |               |
|--------------------------------------|------------|---------------|
| hypothetical protein                 | 15LG_00657 |               |
| hypothetical protein                 | 15LG_00658 |               |
| hypothetical protein                 | 15LG_00659 |               |
| hypothetical protein                 | 15LG_00661 |               |
| Aryl-phospho-beta-D-glucosidase BglH |            | 16E_00361     |
| hypothetical protein                 | 15LG_00662 |               |
| hypothetical protein                 | 15LG_00663 |               |
| hypothetical protein                 | 15LG_00664 |               |
| hypothetical protein                 | 15LG_00665 |               |
| hypothetical protein                 | 15LG_00666 |               |
| Secreted effector protein PipB2      | 15LG_00667 |               |
| hypothetical protein                 | 15LG_00668 |               |
| hypothetical protein                 | 15LG_00669 |               |
| hypothetical protein                 | 15LG_00671 |               |
| hypothetical protein                 | 15LG_00672 |               |
| Aryl-phospho-beta-D-glucosidase BglH |            | Lm_XYSN_00345 |
| hypothetical protein                 | 15LG_00673 |               |
| hypothetical protein                 | 15LG_00674 |               |
| hypothetical protein                 | 15LG_00675 |               |
| hypothetical protein                 | 15LG_00676 |               |
| hypothetical protein                 | 15LG_00677 |               |
| hypothetical protein                 | 15LG_00678 |               |
| Putative DNA repair helicase RadD    | 15LG_00679 |               |
| hypothetical protein                 | 15LG_00680 |               |
| hypothetical protein                 | 15LG_00681 |               |
| hypothetical protein                 | 15LG_00682 |               |
| hypothetical protein                 | 15LG_00683 |               |
| Integrase core domain protein        |            | Lm_XYSN_00588 |
| Integrase core domain protein        |            | Lm_XYSN_00623 |
| Integrase core domain protein        |            | Lm_XYSN_01630 |
| Integrase core domain protein        |            | Lm_XYSN_01766 |
| Integrase core domain protein        |            | Lm_XYSN_01813 |
| hypothetical protein                 | 15LG_00684 |               |
| Integrase core domain protein        |            | Lm_XYSN_02032 |
| hypothetical protein                 | 15LG_00685 |               |
| hypothetical protein                 | 15LG_00686 |               |
| Transposase                          |            | Lm_XYSN_00355 |
| hypothetical protein                 | 15LG_00687 |               |
| Transposase DDE domain protein       |            | Lm_XYSN_00181 |
| Transposase DDE domain protein       |            | Lm_XYSN_00650 |
| Transposase DDE domain protein       |            | Lm_XYSN_00708 |
| Transposase DDE domain protein       |            | Lm_XYSN_00944 |

|                                    |            |               |
|------------------------------------|------------|---------------|
| Transposase DDE domain protein     |            | Lm_XYSN_00950 |
| Transposase DDE domain protein     |            | Lm_XYSN_00964 |
| Transposase DDE domain protein     |            | Lm_XYSN_01145 |
| Transposase DDE domain protein     |            | Lm_XYSN_01151 |
| Transposase DDE domain protein     |            | Lm_XYSN_01360 |
| hypothetical protein               | 15LG_00688 |               |
| Transposase DDE domain protein     |            | Lm_XYSN_01409 |
| Transposase DDE domain protein     |            | Lm_XYSN_01531 |
| Transposase DDE domain protein     |            | Lm_XYSN_01562 |
| Transposase DDE domain protein     |            | Lm_XYSN_01591 |
| Transposase DDE domain protein     |            | Lm_XYSN_01668 |
| Transposase DDE domain protein     |            | Lm_XYSN_01867 |
| Transposase DDE domain protein     |            | Lm_XYSN_01873 |
| Transposase DDE domain protein     |            | Lm_XYSN_01923 |
| Transposase DDE domain protein     |            | Lm_XYSN_02042 |
| Transposase DDE domain protein     |            | Lm_XYSN_02068 |
| hypothetical protein               | 15LG_00689 |               |
| Transposase DDE domain protein     |            | Lm_XYSN_02086 |
| Transposase DDE domain protein     |            | Lm_XYSN_02157 |
| Transposase DDE domain protein     |            | Lm_XYSN_02185 |
| Transposase DDE domain protein     |            | Lm_XYSN_02238 |
| Transposase DDE domain protein     |            | Lm_XYSN_02479 |
| Transposase DDE domain protein     |            | Lm_XYSN_02736 |
| Transposase DDE domain protein     |            | Lm_XYSN_02992 |
| hypothetical protein               | 15LG_00690 |               |
| Chromosome partition protein Smc   | 15LG_00691 |               |
| hypothetical protein               | 15LG_00692 |               |
| Integrase core domain protein      |            | Lm_XYSN_00480 |
| Integrase core domain protein      |            | Lm_XYSN_01285 |
| Integrase core domain protein      |            | Lm_XYSN_02450 |
| Integrase core domain protein      |            | Lm_XYSN_02852 |
| Pesticidal crystal protein Cry22Aa | 15LG_02936 |               |
| hypothetical protein               | 15LG_00693 |               |
| Transposase                        |            | Lm_XYSN_01548 |
| hypothetical protein               | 15LG_00694 |               |
| Transposase                        |            | Lm_XYSN_02063 |
| hypothetical protein               | 15LG_00695 |               |
| hypothetical protein               | 15LG_00696 |               |
| Integrase core domain protein      |            | Lm_XYSN_00354 |
| hypothetical protein               | 15LG_00697 |               |
| hypothetical protein               | 15LG_00698 |               |
| putative protein YqbO              | 15LG_00699 |               |

|                                                         |            |               |
|---------------------------------------------------------|------------|---------------|
| hypothetical protein                                    |            | Lm_XYSN_00194 |
| hypothetical protein                                    | 15LG_00700 |               |
| hypothetical protein                                    | 15LG_00701 |               |
| hypothetical protein                                    | 15LG_00708 |               |
| hypothetical protein                                    |            | 16E_02985     |
| hypothetical protein                                    | 15LG_00709 |               |
| Transposase, Mutator family                             |            | Lm_XYSN_00092 |
| Transposase, Mutator family                             |            | Lm_XYSN_00464 |
| hypothetical protein                                    | 15LG_00710 |               |
| Transposase, Mutator family                             |            | Lm_XYSN_00837 |
| Transposase, Mutator family                             |            | Lm_XYSN_01262 |
| Transposase, Mutator family                             |            | Lm_XYSN_01316 |
| Transposase, Mutator family                             |            | Lm_XYSN_01444 |
| Transposase, Mutator family                             |            | Lm_XYSN_01643 |
| Transposase, Mutator family                             |            | Lm_XYSN_02169 |
| Transposase, Mutator family                             |            | Lm_XYSN_02265 |
| Transposase, Mutator family                             |            | Lm_XYSN_02501 |
| hypothetical protein                                    | 15LG_00711 |               |
| hypothetical protein                                    | 15LG_00835 |               |
| Glutamyl endopeptidase                                  | 15LG_00836 |               |
| hypothetical protein                                    | 15LG_00837 |               |
| Transposase                                             |            | Lm_XYSN_00244 |
| Transposase                                             |            | Lm_XYSN_00587 |
| Transposase                                             |            | Lm_XYSN_00622 |
| Transposase                                             |            | Lm_XYSN_02033 |
| hypothetical protein                                    | 15LG_00838 |               |
| hypothetical protein                                    | 15LG_00839 |               |
| hypothetical protein                                    | 15LG_00840 |               |
| hypothetical protein                                    | 15LG_00841 |               |
| hypothetical protein                                    | 15LG_00842 |               |
| hypothetical protein                                    | 15LG_00843 |               |
| hypothetical protein                                    | 15LG_02935 |               |
| hypothetical protein                                    |            | 16E_00033     |
| Integrase core domain protein                           |            | Lm_XYSN_01547 |
| Integrase core domain protein                           |            | Lm_XYSN_02062 |
| putative murein peptide carboxypeptidase                |            | 16E_00043     |
| hypothetical protein                                    |            | 16E_00044     |
| Sugar phosphatase YidA                                  |            | 16E_00045     |
| Catabolite control protein A                            |            | 16E_00046     |
| N-acetylmannosamine kinase                              |            | 16E_00047     |
| Endoglucanase D                                         |            | 16E_00048     |
| PTS system oligo-beta-mannoside-specific EIIC component |            | 16E_00049     |

|                                                                            |            |
|----------------------------------------------------------------------------|------------|
| Glutamine--fructose-6-phosphate aminotransferase<br>[isomerizing]          | 16E_00050  |
| hypothetical protein                                                       | 16E_00086  |
| ESAT-6 secretion system extracellular protein A                            | 16E_00095  |
| ESAT-6 secretion accessory factor EsaA                                     | 16E_00096  |
| hypothetical protein                                                       | 16E_00097  |
| ESAT-6 secretion accessory factor EsaB                                     | 16E_00098  |
| ESAT-6 secretion machinery protein EssB                                    | 16E_00099  |
| hypothetical protein                                                       | 16E_00414  |
| hypothetical protein                                                       | 16E_00101  |
| ESAT-6 secretion system extracellular protein B                            | 16E_00102  |
| hypothetical protein                                                       | 16E_00103  |
| hypothetical protein                                                       | 16E_00104  |
| ESAT-6 secretion machinery protein EssD                                    | 16E_00105  |
| putative ABC transporter ATP-binding protein                               | 16E_00149  |
| hypothetical protein                                                       | 16E_00191  |
| hypothetical protein                                                       | 16E_00192  |
| hypothetical protein                                                       | 16E_00193  |
| hypothetical protein                                                       | 16E_00194  |
| hypothetical protein                                                       | 16E_00196  |
| hypothetical protein                                                       | 16E_00197  |
| Internalin-A                                                               | 16E_00312  |
| hypothetical protein                                                       | 16E_00367  |
| Sec-independent protein translocase protein TatCy                          | 16E_00410  |
| Sec-independent protein translocase protein TatAy                          | 16E_00411  |
| putative peptidase                                                         | 16E_00412  |
| Pesticidal crystal protein Cry22Aa                                         | 16E_00490  |
| hypothetical protein                                                       | 16E_00510  |
| Putative trans-acting regulator                                            | 16E_00511  |
| hypothetical protein                                                       | 16E_00512  |
| hypothetical protein                                                       | 15LG_00343 |
| Biofilm operon icaADBC HTH-type negative transcriptional<br>regulator IcaR | 16E_00896  |
| Quaternary ammonium compound-resistance protein SugE                       | 16E_00897  |
| Quaternary ammonium compound-resistance protein SugE                       | 16E_00898  |
| Phosphoribosylformylglycinamide cyclo-ligase                               | 16E_01846  |
| Putative cysteine desulfurase NifS                                         | 16E_01847  |
| L-aspartate oxidase                                                        | 16E_01848  |
| putative nicotinate-nucleotide pyrophosphorylase<br>[carboxylating]        | 16E_01849  |
| Maltose phosphorylase                                                      | 16E_01850  |
| hypothetical protein                                                       | 16E_02612  |

|                                                    |            |           |               |
|----------------------------------------------------|------------|-----------|---------------|
| Putative monooxygenase YcnE                        |            | 16E_02613 |               |
| hypothetical protein                               | 15LG_01882 |           |               |
| Transposase DDE domain protein                     |            |           | Lm_XYSN_02449 |
| hypothetical protein                               | 15LG_02157 |           |               |
| hypothetical protein                               |            | 16E_00195 |               |
| hypothetical protein                               | 15LG_02939 |           |               |
| hypothetical protein                               |            | 16E_02886 |               |
| Nucleoid occlusion protein                         |            | 16E_02887 |               |
| hypothetical protein                               |            | 16E_00211 |               |
| hypothetical protein                               |            | 16E_02946 |               |
| Deoxyguanosinetriphosphate triphosphohydrolase     |            | 16E_02968 |               |
| hypothetical protein                               |            | 16E_02972 |               |
| Phosphate acetyltransferase                        |            | 16E_02982 |               |
| Adenosyl-chloride synthase                         |            | 16E_02983 |               |
| hypothetical protein                               |            | 16E_02984 |               |
| Holo-[acyl-carrier-protein] synthase               |            | 16E_02987 |               |
| hypothetical protein                               |            | 16E_02994 |               |
| hypothetical protein                               |            | 16E_01531 |               |
| Actin assembly-inducing protein                    |            | 16E_02996 |               |
| Zinc metalloproteinase                             |            | 16E_02997 |               |
| hypothetical protein                               |            |           | Lm_XYSN_00245 |
| hypothetical protein                               |            |           | Lm_XYSN_00246 |
| hypothetical protein                               |            |           | Lm_XYSN_01785 |
| Integrase core domain protein                      |            |           | Lm_XYSN_02168 |
| hypothetical protein                               | 15LG_01295 |           |               |
| hypothetical protein                               |            | 16E_00413 |               |
| hypothetical protein                               |            | 16E_00804 |               |
| CRISPR-associated endonuclease Cas9                |            | 16E_02970 |               |
| hypothetical protein                               |            | 16E_00185 |               |
| CRISPR-associated endonuclease Cas9                |            | 16E_02969 |               |
| CRISPR-associated endonuclease Cas9                |            |           | Lm_XYSN_02735 |
| CRISPR-associated endonuclease Cas9                |            | 16E_02998 |               |
| ESAT-6 secretion machinery protein EssC            |            | 16E_00100 |               |
| hypothetical protein                               |            | 16E_00368 |               |
| hypothetical protein                               |            | 16E_00184 |               |
| Lactose transport system permease protein LacF     |            | 16E_00905 |               |
| UDP-N-acetylmuramoylalanine--D-glutamate ligase    |            | 16E_02995 |               |
| hypothetical protein                               |            |           | Lm_XYSN_01890 |
| Internalin B                                       |            | 16E_00489 |               |
| Phosphomevalonate kinase                           |            | 16E_00022 |               |
| PTS system beta-glucoside-specific EIIBC component |            | 16E_00060 |               |
| 30S ribosomal protein S18                          |            | 16E_02973 |               |



|                                      |            |           |               |
|--------------------------------------|------------|-----------|---------------|
| Accessory gene regulator protein B   |            | 16E_02975 |               |
| hypothetical protein                 |            | 16E_00198 |               |
| hypothetical protein                 | 15LG_00107 |           |               |
| hypothetical protein                 | 15LG_00126 |           |               |
| Alpha-xylosidase                     |            | 16E_00230 |               |
| hypothetical protein                 | 15LG_00286 |           |               |
| hypothetical protein                 |            |           | Lm_XYSN_00499 |
| hypothetical protein                 | 15LG_00389 |           |               |
| hypothetical protein                 |            | 16E_00548 |               |
| Serine/threonine-protein kinase PknB | 15LG_00626 |           |               |

---

**Supplementary Table 9: Details of the 31 regions of differences (RODs) observed in the *L. monocytogenes* XYSN as compared to EGD-e.** Yellow highlights indicates RODs detected in *L. ivanovii*. Blue highlights indicates RODs that were exclusive to *L. innocua*.

| #RODs | Start   | End     | Length | encodes-for                                                      | BLAST indicates this region is present in                                                                 |
|-------|---------|---------|--------|------------------------------------------------------------------|-----------------------------------------------------------------------------------------------------------|
| 1     | 21897   | 23868   | 1972   | Lipase, HP                                                       | <i>L. welshimeri</i> , <i>L. monocytogenes</i> lineage-III                                                |
| 2     | 25166   | 32328   | 7163   | peptidoglycan binding protein, Plasmid pRiA4b ORF-3-like protein | <i>L. welshimeri</i> , <i>L. seeligeri</i> and <i>L. monocytogenes</i>                                    |
| 3     | 39463   | 44440   | 4978   | microcin C7 resistance protein, ABC transporter, HP              | <i>L. ivanovii</i> and <i>L. monocytogenes</i>                                                            |
| 4     | 83114   | 97980   | 14867  | TVII secretion protein EssC, LxG, HP, Ugp operon                 | EssC and LxG unique to XYSN, Ugp operon only in <i>L. ivanovii</i>                                        |
| 5     | 101026  | 110607  | 9582   | transposase, integrase, HP, LXG-domain proteins                  | partially in <i>L. ivanovii</i>                                                                           |
| 6     | 126161  | 132161  | 6001   | peptidoglycan binding protein                                    | <i>L. seeligeri</i> and <i>L. monocytogenes</i>                                                           |
| 7     | 142756  | 149455  | 6700   | TVII secretion effector, LxG, and IS                             | except MGE, segment occurs in other <i>L. monocytogenes</i> strains                                       |
| 8     | 314558  | 319611  | 5054   | ABC transporter, HP                                              | <i>L. monocytogenes</i>                                                                                   |
| 9     | 457341  | 479954  | 22614  | wapA operon, transposases                                        | wapA operon in <i>L. monocytogenes</i>                                                                    |
| 10    | 507983  | 512322  | 4340   | TVII secretion effector, LXG protein, colicin, HP                | <i>L. monocytogenes</i>                                                                                   |
| 11    | 551449  | 552060  | 612    | Type I restriction modification                                  | <i>L. monocytogenes</i>                                                                                   |
| 12    | 745082  | 751261  | 6180   | peptidoglycan binding protein                                    | <i>L. welshimeri</i> , <i>L. seeligeri</i> and <i>L. monocytogenes</i>                                    |
| 13    | 770378  | 774943  | 4566   | Menaquinone biosynthesis operon (?)                              | <i>L. ivanovii</i>                                                                                        |
| 14    | 790506  | 795578  | 5073   | HP, transposase, antibiotic resistance protein vanZ              | <i>L. welshimeri</i> , <i>L. ivanovii</i> and <i>L. seeligeri</i>                                         |
| 15    | 826605  | 839583  | 12979  | oxidoreductase, RNA polymerase, peptidoglycan binding protein    | <i>L. monocytogenes</i>                                                                                   |
| 16    | 841193  | 848528  | 7336   | peptidoglycan binding protein                                    | <i>L. welshimeri</i> and <i>L. monocytogenes</i>                                                          |
| 17    | 1108146 | 1126313 | 18168  | homologues to rml operon/WTA                                     | <i>L. monocytogenes</i>                                                                                   |
| 18    | 1132807 | 1135213 | 2407   | TVII secretion effector, LXG domain protein                      | <i>L. monocytogenes</i>                                                                                   |
| 19    | 1193149 | 1194253 | 1105   | membrane protein                                                 | <i>L. monocytogenes</i>                                                                                   |
| 20    | 1245812 | 1253371 | 7560   | Sphingomylinase and i-inlFE, IS256 transposase                   | <i>L. ivanovii</i>                                                                                        |
| 21    | 1431313 | 1435095 | 3783   | IS256 family transposase, integrase, HP                          | IS256 transposase from <i>L. weihenstephanensis</i> and HP from <i>L. ivanovii</i>                        |
| 22    | 1707242 | 1716961 | 9720   | CAAX amino terminal protein, integrase, HP                       | <i>L. innocua</i> , <i>L. monocytogenes</i>                                                               |
| 23    | 1773357 | 1779404 | 6048   | Beta lactamase, excinuclease                                     | <i>L. innocua</i>                                                                                         |
| 24    | 2211006 | 2212929 | 1924   | NAD(P)H dehydrogenase                                            | Unique (although low homology to few of <i>L. monocytogenes</i> strains)                                  |
| 25    | 2504847 | 2505908 | 1062   | Cell surface protein (Leucine-rich domain)                       | several <i>L. monocytogenes</i>                                                                           |
| 26    | 2535962 | 2544430 | 8469   | Leucine-rich repeat, IS256 family transposase and HP, integrase  | Leucine-rich repeats: <i>L. ivanovii</i> , HP: <i>L. monocytogenes</i>                                    |
| 27    | 2663252 | 2666011 | 2760   | Leucine-rich repeat-LPxTG protein                                | Low homology <i>L. monocytogenes</i>                                                                      |
| 27    | 2678257 | 2717469 | 39213  | prophage, internalin C, HP                                       | Prophage: low homology <i>L. innocua</i> , internalin C: <i>L. ivanovii</i> , HP: <i>L. monocytogenes</i> |
| 29    | 2729551 | 2737952 | 8402   | Type II crispr, IS5/IS1182 family transposase                    | <i>L. monocytogenes</i>                                                                                   |

|    |         |         |      |                                              |                                                |
|----|---------|---------|------|----------------------------------------------|------------------------------------------------|
| 30 | 2911964 | 2915445 | 3482 | Fic protein, multi drug transporter          | <i>L. ivanovii</i> and <i>L. monocytogenes</i> |
| 31 | 2927927 | 2935695 | 7769 | Cobalt transporter operon and other proteins | <i>L. ivanovii</i>                             |

**Supplementary Table 10: Details of the 90 genes encoding putative transposases in the chromosome of *L. monocytogenes* XYSN.**

| 5' location | 3' location | length | Product                        | IS-classification<br>(transposase<br>family) | BLAST against nucleotide database indicates these transposases can be also<br>found in |
|-------------|-------------|--------|--------------------------------|----------------------------------------------|----------------------------------------------------------------------------------------|
| 103788      | 105032      | 1245   | Transposase                    | IS256                                        | <i>L. newyorkensis</i> and <i>L. weihenstephanensis</i>                                |
| 137069      | 137374      | 306    | Transposase                    | IS3                                          | <i>L. monocytogenes</i>                                                                |
| 137371      | 138150      | 780    | Transposase                    |                                              |                                                                                        |
| 147286      | 147843      | 558    | Transposase                    | IS3                                          | <i>Enterococcus</i> spp.                                                               |
| 147885      | 148601      | 717    | transposase                    |                                              |                                                                                        |
| 180455      | 181699      | 1245   | transposase                    | IS256                                        | <i>L. newyorkensis</i> and <i>L. weihenstephanensis</i>                                |
| 195118      | 196515      | 1398   | transposase DDE domain protein | IS5/IS1182                                   | <i>L. ivanovii</i> , some <i>L. monocytogenes</i> , <i>Bacillus</i> spp.               |
| 207318      | 207977      | 660    | transposase                    | IS3                                          | <i>L. monocytogenes</i>                                                                |
| 207974      | 208279      | 306    | transposase                    |                                              |                                                                                        |
| 266685      | 267242      | 558    | transposase                    | IS3                                          | <i>Enterococcus</i> spp.                                                               |
| 267284      | 267781      | 498    | transposase                    |                                              |                                                                                        |
| 375975      | 376691      | 717    | transposase                    | IS3                                          | <i>Enterococcus</i> spp.                                                               |
| 376733      | 377290      | 558    | transposase                    |                                              |                                                                                        |
| 407420      | 407587      | 168    | transposase                    | LxG domain                                   | <i>L. monocytogenes</i>                                                                |
| 407682      | 408926      | 1245   | transposase                    | IS256                                        | <i>L. newyorkensis</i> and <i>L. weihenstephanensis</i>                                |
| 474324      | 475568      | 1245   | transposase                    | IS256                                        | <i>L. newyorkensis</i> and <i>L. weihenstephanensis</i>                                |
| 475666      | 475929      | 264    | transposase (InsE family)      | InsE family                                  |                                                                                        |
| 476994      | 477887      | 894    | transposase                    |                                              | <i>L. ivanovii</i>                                                                     |
| 477851      | 478129      | 279    | transposase                    |                                              |                                                                                        |
| 478845      | 479219      | 375    | transposase                    | HTH superfamily<br>protein                   |                                                                                        |
| 479625      | 479954      | 330    | transposase                    | HTH superfamily<br>protein                   |                                                                                        |
| 489339      | 490664      | 1326   | transposase                    | IS3                                          | <i>Bacillus</i> spp., <i>L. newyorkensis</i>                                           |
| 544082      | 544885      | 804    | transposase                    | IS3                                          | <i>Enterococcus</i> spp.                                                               |
| 544927      | 545484      | 558    | transposase                    |                                              |                                                                                        |
| 593980      | 594537      | 558    | transposase                    | IS3                                          | <i>Enterococcus</i> spp.                                                               |
| 594579      | 595382      | 804    | transposase                    |                                              |                                                                                        |
| 629918      | 630475      | 558    | transposase                    | IS3                                          | <i>Enterococcus</i> spp.                                                               |
| 630517      | 631320      | 804    | transposase                    |                                              |                                                                                        |
| 655410      | 656807      | 1398   | transposase DDE domain protein | IS5/IS1182                                   | <i>L. ivanovii</i> , some <i>L. monocytogenes</i> , <i>Bacillus</i> spp.               |

|         |         |      |                                |            |                                                                          |
|---------|---------|------|--------------------------------|------------|--------------------------------------------------------------------------|
| 693798  | 694082  | 285  | transposase                    |            |                                                                          |
| 702892  | 704289  | 1398 | transposase DDE domain protein | IS5/IS1182 | <i>L. ivanovii</i> , some <i>L. monocytogenes</i> , <i>Bacillus</i> spp. |
| 791847  | 792149  | 303  | transposase                    | IS256      | <i>L. newyorkensis</i> and <i>L. weihenstephanensis</i>                  |
| 831889  | 833133  | 1245 | transposase                    | IS256      | <i>L. newyorkensis</i> and <i>L. weihenstephanensis</i>                  |
| 871489  | 871773  | 285  | transposase                    |            |                                                                          |
| 945733  | 947130  | 1398 | transposase DDE domain protein | IS5/IS1182 | <i>L. ivanovii</i> , some <i>L. monocytogenes</i> , <i>Bacillus</i> spp. |
| 951618  | 953015  | 1398 | transposase DDE domain protein | IS5/IS1182 | <i>L. ivanovii</i> , some <i>L. monocytogenes</i> , <i>Bacillus</i> spp. |
| 967894  | 969291  | 1398 | transposase DDE domain protein | IS5/IS1182 | <i>L. ivanovii</i> , some <i>L. monocytogenes</i> , <i>Bacillus</i> spp. |
| 1097652 | 1098008 | 357  | transposase                    | IS256      | <i>L. newyorkensis</i> and <i>L. weihenstephanensis</i>                  |
| 1098018 | 1098896 | 879  | transposase                    |            |                                                                          |
| 1138535 | 1139932 | 1398 | transposase DDE domain protein | IS5/IS1182 | <i>L. ivanovii</i> , some <i>L. monocytogenes</i> , <i>Bacillus</i> spp. |
| 1146095 | 1147492 | 1398 | transposase DDE domain protein | IS5/IS1182 | <i>L. ivanovii</i> , some <i>L. monocytogenes</i> , <i>Bacillus</i> spp. |
| 1249437 | 1250681 | 1245 | transposase                    | IS256      | <i>L. newyorkensis</i> and <i>L. weihenstephanensis</i>                  |
| 1250801 | 1251067 | 267  | transposase                    |            | <i>L. ivanovii</i>                                                       |
| 1268874 | 1270199 | 1326 | transposase                    | IS3        | <i>Bacillus</i> spp., <i>L. newyorkensis</i>                             |
| 1300425 | 1301669 | 1245 | transposase                    | IS256      | <i>L. newyorkensis</i> and <i>L. weihenstephanensis</i>                  |
| 1301978 | 1302865 | 888  | transposase                    | IS3        | <i>L. fleischmannii</i>                                                  |
| 1302877 | 1303572 | 696  | transposase                    |            |                                                                          |
| 1347666 | 1349063 | 1398 | transposase DDE domain protein | IS5/IS1182 | <i>L. ivanovii</i> , some <i>L. monocytogenes</i> , <i>Bacillus</i> spp. |
| 1392430 | 1393827 | 1398 | transposase DDE domain protein | IS5/IS1182 | <i>L. ivanovii</i> , some <i>L. monocytogenes</i> , <i>Bacillus</i> spp. |
| 1431313 | 1432557 | 1245 | transposase                    | IS256      | <i>L. newyorkensis</i> and <i>L. weihenstephanensis</i>                  |
| 1519181 | 1520578 | 1398 | transposase DDE domain protein | IS5/IS1182 | <i>L. ivanovii</i> , some <i>L. monocytogenes</i> , <i>Bacillus</i> spp. |
| 1534704 | 1535591 | 888  | transposase                    | IS3        | <i>L. fleischmannii</i>                                                  |
| 1535603 | 1536298 | 696  | transposase                    |            |                                                                          |
| 1552182 | 1553579 | 1398 | transposase DDE domain protein | IS5/IS1182 | <i>L. ivanovii</i> , some <i>L. monocytogenes</i> , <i>Bacillus</i> spp. |
| 1582112 | 1583509 | 1398 | transposase DDE domain protein | IS5/IS1182 | <i>L. ivanovii</i> , some <i>L. monocytogenes</i> , <i>Bacillus</i> spp. |
| 1628197 | 1629000 | 804  | transposase                    | IS3        | <i>Enterococcus</i> spp.                                                 |
| 1629042 | 1629599 | 558  | transposase                    |            |                                                                          |
| 1641886 | 1643130 | 1245 | transposase                    | IS256      | <i>L. newyorkensis</i> and <i>L. weihenstephanensis</i>                  |
| 1667416 | 1668813 | 1398 | transposase DDE domain protein | IS5/IS1182 | <i>L. ivanovii</i> , some <i>L. monocytogenes</i> , <i>Bacillus</i> spp. |
| 1762079 | 1762882 | 804  | transposase                    | IS3        | <i>Enterococcus</i> spp.                                                 |
| 1762924 | 1763481 | 558  | transposase                    |            |                                                                          |
| 1809869 | 1810672 | 804  | transposase                    | IS3        | <i>Enterococcus</i> spp.                                                 |
| 1810714 | 1811271 | 558  | transposase                    |            |                                                                          |

|         |         |      |                                |                         |                                                                          |
|---------|---------|------|--------------------------------|-------------------------|--------------------------------------------------------------------------|
| 1871317 | 1872714 | 1398 | transposase DDE domain protein | IS5/IS1182              | <i>L. ivanovii</i> , some <i>L. monocytogenes</i> , <i>Bacillus</i> spp. |
| 1875526 | 1876923 | 1398 | transposase DDE domain protein | IS5/IS1182              | <i>L. ivanovii</i> , some <i>L. monocytogenes</i> , <i>Bacillus</i> spp. |
| 1877072 | 1878469 | 1398 | transposase DDE domain protein | IS5/IS1182              | <i>L. ivanovii</i> , some <i>L. monocytogenes</i> , <i>Bacillus</i> spp. |
| 1926400 | 1927797 | 1398 | transposase DDE domain protein | IS5/IS1182              | <i>L. ivanovii</i> , some <i>L. monocytogenes</i> , <i>Bacillus</i> spp. |
| 2035488 | 2036291 | 804  | transposase                    | IS3                     | <i>Enterococcus</i> spp.                                                 |
| 2036333 | 2036890 | 558  | transposase                    |                         |                                                                          |
| 2045153 | 2046550 | 1398 | transposase DDE domain protein | IS5/IS1182              | <i>L. ivanovii</i> , some <i>L. monocytogenes</i> , <i>Bacillus</i> spp. |
| 2065256 | 2066143 | 888  | transposase                    | IS3                     | <i>L. fleischmannii</i>                                                  |
| 2066155 | 2066850 | 696  | transposase                    |                         |                                                                          |
| 2070994 | 2072391 | 1398 | transposase DDE domain protein | IS5/IS1182              | <i>L. ivanovii</i> , some <i>L. monocytogenes</i> , <i>Bacillus</i> spp. |
| 2090441 | 2091838 | 1398 | transposase DDE domain protein | IS5/IS1182              | <i>L. ivanovii</i> , some <i>L. monocytogenes</i> , <i>Bacillus</i> spp. |
| 2167416 | 2168813 | 1398 | transposase DDE domain protein | IS5/IS1182              | <i>L. ivanovii</i> , some <i>L. monocytogenes</i> , <i>Bacillus</i> spp. |
| 2178227 | 2178592 | 366  | transposase                    | HTH superfamily protein |                                                                          |
| 2178744 | 2179988 | 1245 | transposase                    | IS256                   | <i>L. newyorkensis</i> and <i>L. weihenstephanensis</i>                  |
| 2179989 | 2180495 | 507  | transposase                    |                         |                                                                          |
| 2180507 | 2181202 | 696  | transposase                    |                         |                                                                          |
| 2192511 | 2193908 | 1398 | transposase DDE domain protein | IS5/IS1182              | <i>L. ivanovii</i> , some <i>L. monocytogenes</i> , <i>Bacillus</i> spp. |
| 2244879 | 2246276 | 1398 | transposase DDE domain protein | IS5/IS1182              | <i>L. ivanovii</i> , some <i>L. monocytogenes</i> , <i>Bacillus</i> spp. |
| 2270509 | 2271753 | 1245 | transposase                    | IS256                   | <i>L. newyorkensis</i> and <i>L. weihenstephanensis</i>                  |
| 2451719 | 2452897 | 1179 | transposase DDE domain protein | IS5/IS1182              | <i>L. ivanovii</i> , some <i>L. monocytogenes</i> , <i>Bacillus</i> spp. |
| 2452929 | 2454254 | 1326 | transposase                    | IS3                     | <i>Bacillus</i> spp., <i>L. newyorkensis</i>                             |
| 2479598 | 2480995 | 1398 | transposase DDE domain protein | IS5/IS1182              | <i>L. ivanovii</i> , some <i>L. monocytogenes</i> , <i>Bacillus</i> spp. |
| 2498728 | 2499972 | 1245 | transposase                    | IS256                   | <i>L. newyorkensis</i> and <i>L. weihenstephanensis</i>                  |
| 2539378 | 2540622 | 1245 | transposase                    | IS256                   | <i>L. newyorkensis</i> and <i>L. weihenstephanensis</i>                  |
| 2735845 | 2737242 | 1398 | transposase DDE domain protein | IS5/IS1182              | <i>L. ivanovii</i> , some <i>L. monocytogenes</i> , <i>Bacillus</i> spp. |
| 2835844 | 2837169 | 1326 | transposase                    | IS3                     | <i>Bacillus</i> spp., <i>L. newyorkensis</i>                             |
| 2985439 | 2986836 | 1398 | transposase DDE domain protein | IS5/IS1182              | <i>L. ivanovii</i> , some <i>L. monocytogenes</i> , <i>Bacillus</i> spp. |

## References:

1. Doumith, M., Buchrieser, C., Glaser, P., Jacquet, C. & Martin, P. Differentiation of the Major *Listeria monocytogenes* Serovars by Multiplex PCR Differentiation of the Major *Listeria monocytogenes* Serovars by Multiplex PCR. *J. Clin. Microbiol.* **42**, 3819–3822 (2004).
2. Shen, Y. *et al.* Structural and functional diversity in *Listeria* cell wall teichoic acids. *J. Biol. Chem.* jbc.M117.813964 **292**(43), 17832-17844 (2017). doi:10.1074/jbc.M117.813964
3. Seeliger, H. P. R. & Höhne, K. Chapter II Serotyping of *Listeria monocytogenes* and related Species. *Methods Microbiol.* **13**, 31–49 (1979).
4. Sullivan, M. J., Petty, N. K. & Beatson, S. A. Easyfig: a genome comparison visualizer. *Bioinformatics* **27**, 1009–1010 (2011).
5. Sahl, J. W., Caporaso, J. G., Rasko, D. A. & Keim, P. The large-scale blast score ratio (LS-BSR) pipeline: a method to rapidly compare genetic content between bacterial genomes. *PeerJ* **2**, e332 (2014).
6. Hadfield, J. *et al.* Phandango: an interactive viewer for bacterial population genomics. *Bioinformatics* **34**, 292–293 (2018).
7. Chen, L., Zheng, D., Liu, B., Yang, J. & Jin, Q. VFDB 2016: Hierarchical and refined dataset for big data analysis - 10 years on. *Nucleic Acids Res.* **44**, D694-D697 (2016).
8. Page, A. J. *et al.* Roary: rapid large-scale prokaryote pan genome analysis. *Bioinformatics* **31**, 3691-3693 (2015).
